# Supplementary material for: Directed Mammalian Gene Regulatory Networks Using Expression and Comparative Genomic Hybridization Microarray Data from Radiation Hybrids
Source: PLoS Comput Biol. 2009 Jun 12;5(6):e1000407. doi: 10.1371/journal.pcbi.1000407 (PMC2690838; doi:10.1371/journal.pcbi.1000407)
Supplement: Dataset S1 — Significance of overlap between RH network and existing datasets. Figures 1, S3 and S4 based on this dataset using one-sided Fisher's exact and chi-square tests. Expected and observed overlap and corresponding p-values shown. (0.78 MB XLS) [file pcbi.1000407.s007.xls]

Right-tailed thresholding
Correlation coefficient threshold	Expected overlap with HPRD	Observed overlap with HPRD	p-val (HPRD)	Expected overlap with KEGG	Observed overlap with KEGG	p-val (KEGG)	Expected overlap with SymAtlas	Observed overlap with SymAtlas	p-val (SymAtlas)	Expected overlap with GO	Observed overlap with GO	p-val (GO)	Expected overlap with GO mol.	Observed overlap with GO mol.	p-val (GO mol.)	Expected overlap with GO cell.	Observed overlap with GO cell.	p-val (GO cell.)	Expected overlap with GO bio.	Observed overlap with GO bio.	p-val (GO bio.)
-0.377096	20627	20627	1	137832	137832	1	1.85583e+07	18558263	1	772562	772562	1	350841	350841	1	138091	138091	1	396979	396979	1
-0.369529	20627	20627	1	137832	137832	1	1.85583e+07	18558263	0.837518	772562	772562	0.985686	350841	350841	1	138091	138091	0.977322	396979	396979	1
-0.361962	20627	20627	1	137832	137832	1	1.85583e+07	18558263	0.837518	772562	772562	0.985686	350841	350841	1	138091	138091	0.977322	396979	396979	1
-0.354395	20627	20627	1	137832	137832	1	1.85583e+07	18558263	0.837518	772562	772562	0.985686	350841	350841	1	138091	138091	0.977322	396979	396979	1
-0.346829	20627	20627	1	137832	137832	1	1.85583e+07	18558263	0.412071	772562	772562	0.985686	350841	350841	1	138091	138091	0.977322	396979	396979	1
-0.339262	20627	20627	1	137832	137832	1	1.85583e+07	18558261	0.786816	772562	772562	0.985686	350841	350841	1	138091	138091	0.977322	396979	396979	1
-0.331695	20627	20627	0.998848	137832	137832	1	1.85583e+07	18558260	0.705865	772562	772562	0.943961	350841	350841	0.976507	138091	138091	0.955158	396979	396979	0.959481
-0.324128	20627	20627	0.9954	137832	137832	1	1.85583e+07	18558259	0.719368	772562	772561	0.991458	350841	350841	0.953566	138091	138090	0.99848	396979	396979	0.920605
-0.316561	20627	20627	0.993108	137832	137832	0.800953	1.85583e+07	18558259	0.33266	772562	772561	0.98099	350841	350841	0.931164	138091	138090	0.99848	396979	396979	0.859279
-0.308994	20627	20627	0.991964	137832	137832	0.800953	1.85583e+07	18558256	0.352945	772562	772561	0.95055	350841	350841	0.867067	138091	138090	0.99848	396979	396979	0.802038
-0.301428	20627	20627	0.98854	137832	137832	0.800953	1.85582e+07	18558249	0.536194	772561	772559	0.997213	350841	350840	0.967559	138091	138090	0.997007	396979	396977	0.996296
-0.293861	20627	20627	0.986263	137832	137832	0.800953	1.85582e+07	18558235	0.779416	772561	772558	0.997879	350841	350839	0.9905	138091	138090	0.995086	396979	396977	0.98788
-0.286294	20627	20627	0.967125	137832	137832	0.800953	1.85582e+07	18558211	0.924351	772560	772557	0.994331	350840	350838	0.992552	138091	138090	0.983348	396978	396977	0.940025
-0.278727	20626.9	20627	0.942908	137832	137832	0.716821	1.85582e+07	18558182	0.951949	772559	772555	0.993922	350840	350838	0.959096	138090	138090	0.897771	396978	396975	0.983787
-0.271160	20626.9	20627	0.912962	137831	137832	0.459858	1.85582e+07	18558139	0.905815	772558	772553	0.989073	350839	350838	0.858756	138090	138089	0.958598	396977	396974	0.976429
-0.263593	20626.9	20627	0.864817	137831	137832	0.211469	1.85581e+07	18558064	0.96714	772555	772549	0.984079	350838	350835	0.945529	138090	138088	0.961745	396975	396972	0.965318
-0.256027	20626.8	20627	0.786819	137830	137832	0.135662	1.8558e+07	18557941	0.97324	772550	772545	0.946373	350835	350834	0.805384	138089	138088	0.872097	396973	396968	0.977205
-0.248460	20626.6	20627	0.668018	137828	137830	0.292248	1.85578e+07	18557741	0.998655	772543	772539	0.866424	350832	350832	0.629095	138088	138086	0.875521	396969	396966	0.896043
-0.240893	20626.3	20627	0.49617	137826	137827	0.493377	1.85575e+07	18557470	0.969644	772532	772533	0.475013	350827	350830	0.295931	138086	138082	0.950048	396964	396965	0.415713
-0.233326	20625.9	20625	0.898394	137823	137825	0.319527	1.85571e+07	18557015	0.985604	772515	772510	0.791379	350820	350819	0.606453	138082	138074	0.996923	396955	396958	0.290111
-0.225759	20625.2	20624	0.899146	137820	137823	0.20325	1.85564e+07	18556325	0.999117	772490	772491	0.430844	350808	350809	0.480369	138077	138071	0.963626	396941	396946	0.255725
-0.218192	20624.3	20622	0.942991	137812	137817	0.167357	1.85555e+07	18555348	0.999822	772453	772451	0.558927	350792	350788	0.733105	138070	138064	0.935216	396922	396928	0.225477
-0.210626	20622.9	20616	0.998856	137802	137802	0.553307	1.85541e+07	18553912	0.999761	772397	772390	0.713211	350766	350762	0.694552	138061	138054	0.909875	396894	396890	0.67369
-0.203059	20620.9	20616	0.978699	137787	137787	0.568627	1.85521e+07	18551817	0.999886	772317	772297	0.903134	350730	350719	0.856997	138047	138039	0.898981	396854	396839	0.909534
-0.195492	20618	20614	0.927775	137766	137768	0.378454	1.85492e+07	18548919	0.999407	772203	772175	0.930696	350679	350656	0.965639	138028	138023	0.745851	396796	396776	0.928834
-0.187925	20613.8	20609	0.92334	137733	137737	0.345404	1.8545e+07	18544728	0.998149	772040	771991	0.985336	350605	350575	0.976173	138000	137999	0.556333	396713	396680	0.97883
-0.180358	20608	20606	0.728446	137689	137698	0.219317	1.85392e+07	18538852	0.998359	771810	771777	0.88732	350501	350493	0.667654	137962	137967	0.333238	396597	396547	0.995093
-0.172791	20599.9	20595	0.84936	137623	137633	0.233807	1.85311e+07	18530533	0.999793	771488	771454	0.851812	350354	350341	0.720046	137908	137923	0.123567	396434	396369	0.997583
-0.165225	20588.8	20586	0.711295	137539	137563	0.0718127	1.852e+07	18519422	0.999499	771050	771003	0.888069	350153	350144	0.632426	137832	137851	0.116176	396213	396133	0.998267
-0.157658	20573.9	20565	0.888689	137422	137448	0.0864066	1.8505e+07	18504453	0.995831	770452	770351	0.986511	349881	349847	0.866052	137730	137740	0.292667	395910	395788	0.999918
-0.150091	20553.9	20550	0.675913	137269	137311	0.0316197	1.84848e+07	18484362	0.969541	769650	769584	0.89271	349516	349484	0.813556	137593	137608	0.253891	395507	395399	0.997751
-0.142524	20527.2	20518	0.821048	137061	137111	0.0286618	1.84581e+07	18457425	0.9906	768586	768553	0.70105	349033	349036	0.474353	137411	137415	0.436105	394969	394860	0.992805
-0.134957	20492.2	20476	0.919015	136787	136856	0.0116157	1.84231e+07	18421973	0.99944	767196	767119	0.855177	348403	348386	0.63446	137175	137151	0.793846	394260	394121	0.996367
-0.127390	20446.3	20432	0.857434	136435	136529	0.00363193	1.83781e+07	18377024	0.997729	765405	765377	0.631753	347589	347610	0.354381	136873	136853	0.718987	393347	393213	0.987929
-0.119824	20388.5	20372	0.859125	135989	136122	0.000478658	1.8321e+07	18319731	0.997463	763129	763148	0.42007	346554	346613	0.179782	136488	136457	0.783764	392186	392094	0.910955
-0.112257	20315.1	20296	0.862012	135435	135581	0.000735518	1.82489e+07	18247784	0.986264	760249	760270	0.425117	345244	345333	0.113622	136005	135929	0.955272	390717	390590	0.948137
-0.104690	20223.9	20196	0.919518	134746	134866	0.0106963	1.81593e+07	18158093	0.985724	756668	756755	0.240758	343617	343729	0.0893123	135402	135312	0.962253	388888	388791	0.862983
-0.097123	20111.7	20078	0.933728	133898	134064	0.00224628	1.80493e+07	18048269	0.951255	752280	752429	0.143398	341631	341750	0.102473	134659	134514	0.994479	386643	386587	0.711791
-0.089556	19976.8	19930	0.968961	132861	133094	0.000184351	1.79163e+07	17914908	0.97653	746972	747087	0.23097	339222	339322	0.170398	133766	133550	0.999622	383926	383925	0.501936
-0.081989	19813.3	19762	0.966715	131634	131804	0.00990407	1.7757e+07	17755530	0.967219	740584	740824	0.0836256	336313	336531	0.0312957	132691	132466	0.999201	380648	380679	0.399971
-0.074423	19619	19578	0.907649	130189	130354	0.0201521	1.75684e+07	17566577	0.981109	733007	733310	0.0574725	332864	333174	0.00842158	131407	131075	0.999987	376763	376834	0.302813
-0.066856	19391.7	19359	0.831486	128501	128693	0.0147648	1.73477e+07	17345815	0.974153	724144	724486	0.0529909	328824	329233	0.00207948	129916	129511	0.999998	372214	372253	0.398511
-0.059289	19128.7	19125	0.539313	126575	126780	0.0166916	1.70936e+07	17092883	0.739177	713884	714405	0.0121228	324164	324658	0.000768618	128172	127766	0.999991	366938	367050	0.249188
-0.051722	18827.3	18849	0.295784	124363	124637	0.00434329	1.68035e+07	16802493	0.80363	702154	702687	0.016933	318832	319339	0.00138489	126198	125734	0.999997	360911	360944	0.426666
-0.044155	18484.8	18562	0.0389485	121867	122207	0.00122619	1.64761e+07	16476540	0.359919	688883	689360	0.0393564	312807	313263	0.00633139	123943	123394	1	354071	354140	0.361435
-0.036588	18101.6	18158	0.115361	119085	119503	0.000262356	1.61106e+07	16112126	0.133762	674053	674811	0.00459031	306067	306694	0.000710696	121427	120899	0.999995	346427	346546	0.284033
-0.029022	17677.2	17761	0.0476247	116045	116566	2.35471e-05	1.57083e+07	15710212	0.0849556	657660	658531	0.0025195	298617	299380	0.000136609	118642	118104	0.999987	337984	338024	0.428127
-0.021455	17212.5	17291	0.0705518	112728	113352	2.07402e-06	1.52686e+07	15271517	0.024579	639743	640725	0.00142812	290477	291282	0.000146312	115581	114963	0.999997	328752	328815	0.394474
-0.013888	16707	16833	0.0126482	109143	109824	9.04315e-07	1.47937e+07	14798666	0.000782587	620334	621324	0.00217221	281671	282546	9.38469e-05	112254	111476	1	318751	318927	0.239893
-0.006321	16162.8	16263	0.0449789	105325	106003	2.70092e-06	1.42857e+07	14292634	1.64993e-05	599523	600962	3.80063e-05	272241	273196	5.02066e-05	108669	108028	0.99999	308035	308493	0.0394921
0.001246	15581.6	15681	0.0535716	101273	101955	5.51367e-06	1.37466e+07	13754712	1.17346e-06	577355	579078	2.74675e-06	262192	263374	1.93927e-06	104839	104143	0.999995	296586	297118	0.0252447
0.008813	14971.4	15106	0.0178052	97057.7	97842	4.97755e-07	1.31823e+07	13191810	5.54552e-08	554121	555900	3.00778e-06	251663	252859	3.25718e-06	100785	100100	0.999987	284598	285177	0.0200201
0.016379	14331.5	14508	0.00379803	92657.9	93471	4.06883e-07	1.25945e+07	12604729	1.21179e-08	529831	531864	2.58528e-07	240649	241794	1.4054e-05	96536	95926	0.999853	272096	272892	0.00308178
0.023946	13667.3	13881	0.000821564	88112.6	88852	5.82784e-06	1.19875e+07	11997454	6.25635e-08	504701	506965	2.51616e-08	229270	230428	1.79581e-05	92144.6	91554	0.999678	259145	260177	0.000264462
0.031513	12983.8	13218	0.000364432	83490.4	84187	2.47035e-05	1.13668e+07	11376735	1.03334e-07	478961	481150	1.1796e-07	217603	218634	0.000154757	87619.1	86945	0.999931	245901	247038	9.12658e-05
0.039080	12287.7	12562	4.9164e-05	78784.6	79506	1.65793e-05	1.07366e+07	10747317	1.73161e-08	452777	455114	2.69751e-08	205744	206668	0.000717512	82984.2	82378	0.999624	232427	233741	1.00792e-05
0.046647	11585.2	11921	1.20638e-06	74047.9	74741	3.78597e-05	1.01018e+07	10113487	1.22538e-09	426351	428651	5.76813e-08	193787	194739	0.000573533	78323.7	77568	0.999983	218827	220050	4.27248e-05
0.054214	10878.8	11234	3.59111e-07	69292.6	69985	4.02199e-05	9.46732e+06	9479773	1.322e-10	399897	402030	5.02836e-07	181796	182748	0.000610029	73620.3	72859	0.999984	205228	206291	0.000338852
0.061780	10173	10533	2.62892e-07	64616.6	65289	6.24195e-05	8.83726e+06	8849681	1.42123e-10	373567	375740	3.13342e-07	169877	170769	0.00121377	68914.2	68262	0.999808	191677	192651	0.000922335
0.069347	9475.46	9789	5.84499e-06	60029.4	60591	0.000629919	8.21638e+06	8228416	4.00433e-10	347571	349670	6.64435e-07	158099	158808	0.00776985	64243.2	63749	0.996503	178296	179195	0.00192873
0.076914	8791.38	9124	1.39364e-06	55544.3	56196	7.74532e-05	7.60905e+06	7622014	1.14354e-11	322089	324325	1.01265e-07	146540	147220	0.009575	59656.1	59203	0.993615	165203	166187	0.000708043
0.084481	8124.51	8465	6.02491e-07	51190.3	51788	0.000213921	7.01878e+06	7031269	3.24547e-11	297292	299462	1.5951e-07	135319	135789	0.0504867	55159.7	54805	0.975651	152468	153593	0.000109694
0.092048	7475.83	7760	1.90691e-05	46991.2	47490	0.00136692	6.4481e+06	6460340	3.50356e-11	273252	275296	4.79888e-07	124424	124732	0.13685	50810.7	50435	0.983029	140109	141192	0.000146285
0.099615	6851.38	7096	0.000148236	42949.1	43340	0.00813301	5.90143e+06	5914556	4.37095e-13	250204	251971	7.56916e-06	113974	114085	0.343307	46619.2	46300	0.966926	128268	129206	0.000673316
0.107181	6254.86	6517	3.54785e-05	39108.1	39462	0.012709	5.3795e+06	5392764	6.13953e-14	228189	229968	3.93876e-06	103984	104089	0.347963	42599.8	42360	0.92123	116978	117920	0.000479061
0.114748	5687.23	5908	0.000288932	35485.4	35788	0.0243886	4.8846e+06	4897914	8.60423e-15	207272	209155	5.57011e-07	94473.2	94530	0.413922	38782.9	38665	0.762511	106266	107283	0.00012119
0.122315	5150.97	5333	0.00169553	32073.5	32334	0.039595	4.41802e+06	4430860	1.01585e-14	187546	189205	4.64308e-06	85520.1	85383	0.706177	35172.7	35044	0.789356	96144.7	97051	0.000361453
0.129882	4645.21	4781	0.0117653	28869	28956	0.271401	3.97993e+06	3993094	2.22045e-16	169023	170627	4.38898e-06	77107.4	76905	0.796806	31761.1	31728	0.584776	86650.6	87573	0.000179415
0.137449	4173.38	4289	0.0224792	25894.2	26032	0.157546	3.57257e+06	3584642	3.9968e-15	151735	153096	4.30585e-05	69251.3	68933	0.912794	28552	28491	0.65911	77790.6	78726	8.29829e-05
0.145016	3734.09	3843	0.024385	23118.9	23275	0.117134	3.19446e+06	3206100	2.55351e-15	135704	136862	0.000244074	61957.6	61709	0.865901	25584.5	25578	0.518079	69566.4	70249	0.00205725
0.152582	3328.28	3389	0.125064	20557.8	20746	0.0662941	2.84547e+06	2855720	2.68841e-13	120892	122017	0.000194055	55216	54928	0.910356	22805.8	22829	0.432408	61988.3	62735	0.000505566
0.160149	2956.41	3040	0.0482548	18222.8	18421	0.0478393	2.52546e+06	2535606	2.9754e-14	107320	108479	6.18608e-05	49039.9	48805	0.874987	20272.8	20294	0.435372	55044.8	55793	0.000269975
0.167716	2616.6	2679	0.0957325	16111.7	16257	0.098921	2.23334e+06	2242907	4.27991e-14	94913.3	95921	0.000217535	43383.9	43174	0.86057	17945.7	17944	0.505614	48700.3	49373	0.000524625
0.175283	2307.76	2379	0.0576778	14193.2	14296	0.167843	1.96796e+06	1976673	3.47777e-13	83608.2	84479	0.000658527	38225.2	38048	0.832937	15828.1	15859	0.395907	42917.2	43406	0.00594233
0.182850	2027.02	2069	0.162953	12440.4	12597	0.0598877	1.72773e+06	1736411	1.7597e-14	73373.8	74263	0.000255012	33551.1	33414	0.785745	13901.7	13901	0.502694	37688.4	38245	0.0012035
0.190417	1774.4	1808	0.201905	10873.9	11012	0.072277	1.51149e+06	1519569	3.28071e-14	64169.8	64963	0.00049442	29345.5	29168	0.861882	12166.3	12228	0.276852	32977.5	33424	0.00486357
0.197983	1548.41	1575	0.240982	9470.73	9603	0.0682819	1.31778e+06	1325038	3.88523e-13	55944.4	56660	0.000778107	25585.4	25473	0.768578	10617.1	10659	0.334304	28753.9	29175	0.00471426
0.205550	1346.13	1367	0.278045	8210.46	8384	0.018418	1.1449e+06	1151347	5.44187e-12	48584.3	49096	0.007862	22221.5	22076	0.844829	9222.97	9248	0.392478	24976.2	25225	0.0507712
0.213117	1166.5	1172	0.434074	7104.92	7225	0.0610143	991691	997539	2.12391e-11	42064	42527	0.00968555	19241.2	19169	0.704862	7987.09	8032	0.300247	21629.3	21817	0.0931246
0.220684	1008.43	996	0.656005	6122.9	6239	0.054303	856168	861273	3.36419e-10	36308.3	36716	0.0136299	16613	16571	0.631363	6893.99	6899	0.475012	18676.1	18844	0.102482
0.228251	868.122	831	0.901133	5269.76	5376	0.0573443	736584	740922	8.70567e-09	31230.3	31563	0.0264318	14293.5	14252	0.639178	5928.92	5911	0.595091	16071.7	16212	0.127689
0.235818	745.153	729	0.726771	4510.95	4592	0.0973116	631900	635953	7.20414e-09	26784.4	27078	0.0329693	12256.2	12226	0.60998	5077.52	5056	0.622204	13791.4	13923	0.125297
0.243384	637.437	635	0.539072	3859.49	3930	0.111824	540233	544063	3.75499e-09	22898	23173	0.0315741	10482.3	10431	0.695703	4334.7	4327	0.547849	11799.3	11965	0.0594481
0.250951	543.751	546	0.46104	3267.9	3283	0.388776	460629	463179	1.61171e-05	19520	19792	0.0235261	8929.41	8920	0.54043	3696.02	3702	0.459833	10066.2	10218	0.0613831
0.258518	462.058	468	0.389843	2768.54	2759	0.576784	391531	393681	7.39587e-05	16587.5	16856	0.0169003	7588.45	7594	0.474184	3138.46	3154	0.388255	8561.98	8726	0.0355799
0.266085	391.365	409	0.183924	2332.31	2332	0.502743	331752	333663	0.000126859	14039.6	14283	0.0184072	6427.5	6460	0.340325	2653.85	2665	0.412528	7248.71	7391	0.0447176
0.273652	330.772	361	0.0468184	1972.02	2002	0.236162	280146	281537	0.00190538	11847	12011	0.0631091	5424.73	5405	0.607035	2240.84	2247	0.447202	6126.28	6254	0.0488752
0.281219	278.689	299	0.110166	1658.27	1675	0.331076	235991	236956	0.0144395	9971.2	10000	0.384991	4569.63	4535	0.698019	1885.91	1857	0.75109	5159.8	5197	0.299839
0.288785	234.271	251	0.135701	1391.36	1401	0.391842	198334	199227	0.0138162	8377.55	8329	0.704431	3839.05	3812	0.670583	1587.03	1540	0.885147	4336.04	4287	0.774584
0.296352	196.597	206	0.25009	1167.52	1157	0.628118	166245	167002	0.0208274	7022.36	6909	0.914462	3219.46	3134	0.93602	1334.38	1271	0.96109	3637.61	3604	0.713525
0.303919	164.444	157	0.720095	977.504	973	0.560725	139005	139783	0.0110864	5865.91	5802	0.800563	2694.78	2638	0.865313	1112.24	1067	0.915874	3041.34	3018	0.665613
0.311486	137.404	127	0.81354	811.75	801	0.655431	116029	116602	0.0325843	4890.7	4818	0.853226	2248.85	2211	0.789708	925.15	884	0.915142	2537.31	2491	0.823472
0.319053	114.192	108	0.719505	673.202	667	0.599983	96583.1	96992	0.0747456	4065.59	3947	0.969826	1869.31	1804	0.936199	770.259	715	0.978292	2109.22	2057	0.874491
0.326620	94.6502	90	0.684159	563.015	558	0.588574	80167.3	80535	0.0774912	3373.43	3262	0.973602	1551.66	1498	0.915166	635.234	570	0.995657	1751.81	1712	0.831411
0.334186	78.4472	78	0.520186	465.538	463	0.549559	66453.5	66940	0.0194238	2797.18	2696	0.973226	1288.73	1244	0.895409	523.545	478	0.978168	1455.08	1407	0.898234
0.341753	64.7637	65	0.48826	380.455	374	0.636952	54911.2	55140	0.142597	2310.85	2213	0.979975	1067.45	1025	0.904743	429.658	395	0.954862	1202.66	1160	0.892582
0.349320	53.4682	52	0.579715	316.906	313	0.591812	45471.5	45633	0.203605	1908.52	1864	0.84795	881.972	864	0.728919	355.251	335	0.861757	995.606	979	0.702147
0.356887	44.0482	43	0.583103	260.92	252	0.720478	37508.2	37558	0.389324	1573.48	1551	0.716149	729.059	726	0.545416	291.277	283	0.68831	821.816	811	0.648142
0.364454	36.4738	33	0.739999	211.866	201	0.785153	30959.9	30924	0.588277	1297.05	1274	0.740571	602.72	609	0.398384	240.682	237	0.594943	677.111	665	0.680475
0.372021	29.9926	26	0.791596	174.577	159	0.893796	25481.5	25428	0.643006	1067.33	1028	0.887534	497.71	496	0.530749	198.093	197	0.531317	556.764	543	0.72166
0.379587	24.6864	23	0.660265	140.439	132	0.774304	20974.6	20942	0.597169	878.187	859	0.742962	410.967	418	0.363473	163.667	161	0.583567	459.312	457	0.543281
0.387154	20.2638	19	0.640741	116.279	110	0.730992	17273.9	17264	0.532842	722.134	702	0.774879	338.581	341	0.447373	134.662	137	0.419221	377.333	366	0.721652
0.394721	16.62	13	0.845008	95.5865	79	0.963588	14154.3	14162	0.471657	593.421	576	0.764422	279.406	278	0.533722	110.51	107	0.632275	309.348	306	0.576039
0.402288	13.5407	12	0.699541	77.8347	65	0.938004	11563	11624	0.267624	484.333	489	0.415407	229.305	228	0.534554	90.8028	89	0.575909	252.277	259	0.334924
0.409855	11.1745	11	0.560886	63.3392	52	0.93402	9445.06	9486	0.322592	397.117	401	0.422185	188.137	189	0.474772	74.0438	72	0.594958	206.584	206	0.516315
0.417422	9.15617	8	0.694268	49.2638	38	0.96567	7697.4	7721	0.384403	324.845	327	0.452062	153.611	157	0.391593	60.7318	58	0.638578	169.326	168	0.540858
0.424988	7.55257	6	0.764472	40.5455	35	0.842463	6305.59	6297	0.547037	268.175	276	0.315134	126.823	133	0.290524	50.4133	49	0.579798	139.913	142	0.429495
0.432555	6.20357	6	0.586575	32.9826	30	0.734544	5150.34	5126	0.644565	221.254	233	0.213155	104.727	108	0.373805	41.7729	44	0.384634	115.595	120	0.339944
0.440122	5.07921	4	0.746115	27.2054	25	0.701705	4193.65	4170	0.655096	182.119	196	0.150061	86.6127	85	0.569201	34.584	40	0.196553	95.1515	105	0.154639
0.447689	4.23133	4	0.610525	22.6887	22	0.593349	3415.36	3413	0.517627	150.442	164	0.132743	71.4525	68	0.659433	28.8918	36	0.109293	79.3773	88	0.164877
0.455256	3.51363	3	0.68185	18.4871	20	0.390014	2802.32	2772	0.734313	123.889	137	0.117701	58.6792	59	0.483197	23.7439	29	0.161153	65.1505	72	0.196404
0.462823	2.95145	3	0.565985	14.8107	18	0.224973	2304.48	2280	0.711299	103.219	120	0.0480801	48.5409	52	0.327653	19.5485	24	0.18088	54.1688	65	0.0691813
0.470389	2.46415	2	0.705461	13.025	13	0.545938	1905.58	1908	0.475891	86.5719	99	0.0892382	40.4941	47	0.170346	16.4189	19	0.291678	45.022	53	0.131934
0.477956	2.09781	1	0.877436	9.97881	11	0.414029	1588.26	1585	0.535589	72.358	87	0.0414731	33.8179	40	0.162316	13.5161	14	0.484153	38.2167	52	0.018749
0.485523	1.78331	1	0.832105	8.82337	10	0.387869	1331.7	1302	0.813087	61.0927	72	0.0799181	28.5125	32	0.279683	11.5204	12	0.48332	32.2466	42	0.0549035
0.493090	1.50222	1	0.77757	7.56289	10	0.221246	1115.6	1076	0.902429	51.8601	61	0.100553	24.1877	28	0.243296	9.84227	10	0.523419	27.4541	37	0.0459952
0.500657	1.29831	1	0.727224	6.19737	8	0.276963	938.169	893	0.946457	44.3166	53	0.109888	20.6902	25	0.19657	8.20945	9	0.436994	23.6064	33	0.037881
0.508224	1.12206	1	0.674611	5.88225	8	0.231244	795.835	767	0.867985	37.6605	43	0.210557	17.4289	22	0.162428	7.18894	9	0.294594	20.4023	25	0.178584
0.515790	0.971144	1	0.621571	5.14697	7	0.252131	672.024	661	0.678921	32.0923	34	0.390815	15.0184	17	0.337077	6.12307	6	0.575912	17.3762	21	0.220037
0.523357	0.831751	1	0.564929	4.93689	7	0.21975	573.56	567	0.617651	27.569	30	0.345646	12.8796	16	0.224745	4.98917	5	0.559604	14.9115	18	0.242473
0.530924	0.758022	1	0.531619	4.72681	6	0.33332	489.72	484	0.611191	24.2768	26	0.389355	11.3672	12	0.464737	4.17276	5	0.405253	13.2684	17	0.182942
0.538491	0.646277	0	1	4.41169	6	0.276195	421.802	412	0.699002	21.0132	22	0.443461	9.89015	10	0.528925	3.42438	2	0.858987	11.502	16	0.120304
0.546058	0.563333	0	1	4.20161	6	0.239494	368.183	359	0.699502	18.6227	20	0.404805	8.70853	10	0.374021	3.08421	2	0.816445	10.0916	14	0.140799
0.553625	0.502276	0	1	3.99153	6	0.204413	324.638	298	0.946901	16.6044	19	0.308646	7.96411	10	0.278168	2.60797	2	0.737691	8.87295	13	0.113673
0.561191	0.459652	0	1	3.78145	6	0.171384	288.405	264	0.941827	15.1444	18	0.262327	7.31422	9	0.312143	2.29048	2	0.670376	8.18831	13	0.0719046
0.568758	0.423939	0	1	3.67641	6	0.155766	257.046	232	0.95609	13.8847	17	0.232882	6.67615	8	0.352867	1.99567	2	0.59592	7.50367	13	0.0416674
0.576325	0.373251	0	1	3.67641	6	0.155766	224.225	200	0.961449	12.5249	14	0.374496	6.06171	5	0.724727	1.83692	2	0.550869	6.77795	12	0.0427985
0.583892	0.349059	0	1	3.46632	6	0.126552	201.477	178	0.964645	11.2652	12	0.452589	5.42363	4	0.791185	1.61014	2	0.480591	6.32609	10	0.106718
0.591459	0.322563	0	1	3.1512	6	0.0883528	186.854	167	0.943753	10.4636	11	0.475177	5.04551	3	0.88061	1.42872	2	0.419721	5.98377	10	0.08139
0.599026	0.30413	0	1	3.1512	6	0.0883528	169.468	149	0.957109	9.57616	11	0.363713	4.60832	3	0.839882	1.15658	2	0.322269	5.51821	10	0.0534698
0.606592	0.276482	0	1	3.1512	6	0.0883528	155.495	141	0.897988	8.66005	10	0.367575	4.21838	3	0.793908	0.997833	2	0.263419	5.06635	9	0.0711376
0.614159	0.25229	0	1	3.1512	6	0.0883528	141.197	133	0.774498	7.87278	10	0.266724	3.80481	3	0.733609	0.816409	2	0.196334	4.71033	9	0.0495881
0.621726	0.230402	0	1	3.04616	5	0.18309	128.198	117	0.860084	7.12844	9	0.286962	3.4267	3	0.667	0.634985	2	0.13211	4.35432	8	0.0736933
0.629293	0.20621	0	1	3.04616	5	0.18309	112.112	107	0.701107	6.26959	8	0.293136	3.04858	3	0.58898	0.566951	2	0.109512	3.87507	7	0.0966343
0.636860	0.186626	0	1	3.04616	5	0.18309	100.251	101	0.467433	5.58251	8	0.199518	2.67046	3	0.500096	0.544273	2	0.102229	3.4369	7	0.0592319
0.644427	0.147457	0	1	2.94112	5	0.164839	84.1655	89	0.282367	4.66641	6	0.325307	2.26871	2	0.663636	0.521595	2	0.0950883	2.84811	6	0.0680412
0.651993	0.125569	0	1	2.83608	5	0.147359	71.6544	74	0.381026	4.06522	6	0.224067	1.99694	2	0.594771	0.476239	2	0.0812729	2.45102	6	0.0377147
0.659560	0.107137	0	1	2.83608	5	0.147359	63.2053	67	0.300991	3.46402	6	0.136221	1.70153	2	0.508525	0.430883	2	0.0681548	2.08131	6	0.0188688
0.667127	0.101377	0	1	2.83608	5	0.147359	55.8937	64	0.118048	3.0346	6	0.0859818	1.52429	2	0.451305	0.362849	2	0.0499968	1.78007	6	0.00931776
0.674694	0.0852487	0	1	2.626	4	0.264748	48.4195	56	0.13383	2.64812	6	0.0513531	1.35886	2	0.394627	0.294814	2	0.033981	1.57468	6	0.0052177
0.682261	0.0783366	0	1	2.626	4	0.264748	44.195	51	0.150199	2.44772	6	0.0374573	1.26433	2	0.361049	0.272136	2	0.0291858	1.45144	6	0.00350725
0.689828	0.0714246	0	1	2.52096	4	0.240787	40.133	47	0.136737	2.23301	6	0.0255293	1.15799	2	0.322477	0.249458	2	0.0246882	1.39667	6	0.00289863
0.697394	0.0668165	0	1	2.52096	4	0.240787	37.5333	44	0.144034	2.00398	6	0.0159307	1.08709	2	0.296427	0.249458	2	0.0246882	1.24605	6	0.00162852
0.704961	0.0622085	0	1	2.31088	3	0.411298	34.6086	38	0.290546	1.76064	6	0.00883051	0.957112	2	0.24837	0.181424	2	0.013148	1.13651	6	0.00101142
0.712528	0.0552964	0	1	2.1008	3	0.351874	31.359	36	0.207295	1.56024	6	0.00497413	0.850766	2	0.209232	0.158746	2	0.0100109	1.04066	6	0.000635314
0.720095	0.0552964	0	1	2.1008	3	0.351874	29.7341	31	0.430365	1.5173	6	0.00434374	0.850766	2	0.209232	0.158746	2	0.0100109	0.999577	6	0.000512067
0.727662	0.0518404	0	1	1.89072	3	0.291798	28.9217	31	0.366539	1.37416	5	0.0125525	0.803501	2	0.19204	0.158746	2	0.0100109	0.903727	5	0.00215174
0.735229	0.0472324	0	1	1.68064	2	0.512549	27.2969	30	0.31593	1.33121	5	0.0110506	0.779869	2	0.183516	0.158746	2	0.0100109	0.890034	5	0.00201107
0.742795	0.0426243	0	1	1.68064	2	0.512549	25.1847	28	0.300758	1.24533	5	0.00842344	0.732604	2	0.166647	0.136068	2	0.00725957	0.835263	5	0.00151514
0.750362	0.0368643	0	1	1.68064	2	0.512549	23.0724	27	0.214778	1.17376	5	0.0065932	0.673523	2	0.145981	0.136068	2	0.00725957	0.807877	5	0.00130404
0.757929	0.0311043	0	1	1.47056	2	0.44105	20.1477	23	0.277304	1.10219	5	0.0050608	0.638074	2	0.133857	0.136068	2	0.00725957	0.753106	5	0.000947877
0.765496	0.0207362	0	1	1.26048	2	0.36412	16.0857	18	0.340475	0.973361	4	0.0165546	0.59081	2	0.11808	0.136068	2	0.00725957	0.657256	4	0.00423402
0.773063	0.0126721	0	1	1.0504	2	0.283473	13.3235	14	0.465475	0.887477	4	0.0121245	0.531729	2	0.0990953	0.136068	2	0.00725957	0.588792	4	0.00283431
0.780630	0.0103681	0	1	1.0504	2	0.283473	11.6987	11	0.637234	0.758649	4	0.00703949	0.49628	2	0.0881638	0.136068	2	0.00725957	0.479249	4	0.00131129
0.788196	0.00921607	0	1	0.945361	2	0.242605	10.5613	9	0.749383	0.715707	4	0.00572622	0.484464	2	0.0846055	0.136068	2	0.00725957	0.438171	4	0.000930404
0.795763	0.00691206	0	1	0.840321	2	0.202015	8.93649	7	0.811306	0.715707	4	0.00572622	0.484464	2	0.0846055	0.136068	2	0.00725957	0.438171	4	0.000930404
0.803330	0.00691206	0	1	0.840321	2	0.202015	7.9616	7	0.703516	0.687079	4	0.0049483	0.472648	2	0.0810925	0.11339	2	0.00491358	0.424478	4	0.000823055
0.810897	0.00576005	0	1	0.840321	2	0.202015	7.31167	6	0.761083	0.615508	3	0.0236528	0.413567	1	0.340339	0.0680341	1	0.0665029	0.383399	3	0.00651163
0.818464	0.00576005	0	1	0.840321	2	0.202015	6.49926	5	0.800714	0.572566	2	0.111945	0.378118	0	1	0.0453561	0	1	0.369706	2	0.052496
0.826031	0.00576005	0	1	0.840321	2	0.202015	5.68686	4	0.84269	0.558251	2	0.107324	0.378118	0	1	0.0453561	0	1	0.356014	2	0.0490425
0.833597	0.00576005	0	1	0.840321	2	0.202015	4.387	4	0.659923	0.515309	1	0.404904	0.354486	0	1	0.0453561	0	1	0.314935	1	0.27175
0.841164	0.00460804	0	1	0.630241	2	0.124321	3.24963	1	0.971167	0.486681	1	0.387495	0.34267	0	1	0.0453561	0	1	0.287549	1	0.25139
0.848731	0.00230402	0	1	0.630241	2	0.124321	2.59971	1	0.941398	0.41511	1	0.34171	0.307221	0	1	0.0453561	0	1	0.219085	1	0.197962
0.856298	0.00230402	0	1	0.525201	1	0.425861	1.7873	1	0.857788	0.300597	0	1	0.224508	0	1	0.0453561	0	1	0.150621	0	1
0.863865	0	0	1	0.525201	1	0.425861	0.97489	1	0.654883	0.24334	0	1	0.177243	0	1	0.022678	0	1	0.136928	0	1
0.871432	0	0	1	0.525201	1	0.425861	0.487445	0	1	0.229026	0	1	0.165427	0	1	0	0	1	0.123235	0	1
0.878998	0	0	1	0.31512	1	0.283179	0	0	1	0.214712	0	1	0.153611	0	1	0	0	1	0.109543	0	1
0.886565	0	0	1	0.21008	1	0.199047	0	0	1	0.17177	0	1	0.129978	0	1	0	0	1	0.082157	0	1
0.894132	0	0	1	0.21008	1	0.199047	0	0	1	0.114513	0	1	0.0827133	0	1	0	0	1	0.0547713	0	1
0.901699	0	0	1	0.21008	1	0.199047	0	0	1	0.100199	0	1	0.0708972	0	1	0	0	1	0.0547713	0	1
0.909266	0	0	1	0	0	1	0	0	1	0.0572566	0	1	0.0354486	0	1	0	0	1	0.0273857	0	1
Left-tailed thresholding
Correlation coefficient threshold	Expected overlap with HPRD	Observed overlap with HPRD	p-val (HPRD)	Expected overlap with KEGG	Observed overlap with KEGG	p-val (KEGG)	Expected overlap with SymAtlas	Observed overlap with SymAtlas	p-val (SymAtlas)	Expected overlap with GO	Observed overlap with GO	p-val (GO)	Expected overlap with GO mol.	Observed overlap with GO mol.	p-val (GO mol.)	Expected overlap with GO cell.	Observed overlap with GO cell.	p-val (GO cell.)	Expected overlap with GO bio.	Observed overlap with GO bio.	p-val (GO bio.)
-0.551133	0.00115201	0	1	0	0	1	0.812408	0	1	0.0286283	0	1	0	0	1	0.0453561	0	1	0.0136928	0	1
-0.543566	0.00230402	0	1	0	0	1	1.29985	0	1	0.0572566	0	1	0	0	1	0.0453561	0	1	0.0410785	0	1
-0.535999	0.00460804	0	1	0	0	1	1.94978	1	0.880895	0.100199	0	1	0	0	1	0.0453561	0	1	0.082157	0	1
-0.528433	0.0138241	0	1	0	0	1	2.92467	2	0.815352	0.214712	0	1	0	0	1	0.11339	0	1	0.178007	0	1
-0.520866	0.0138241	0	1	0	0	1	3.41211	2	0.877471	0.229026	0	1	0	0	1	0.136068	0	1	0.1917	0	1
-0.513299	0.0149761	0	1	0	0	1	4.06204	2	0.930494	0.286283	0	1	0	0	1	0.22678	0	1	0.246471	0	1
-0.505732	0.0184321	0	1	0	0	1	5.36189	4	0.806971	0.343539	0	1	0	0	1	0.249458	0	1	0.260164	0	1
-0.498165	0.0218882	0	1	0	0	1	6.33678	6	0.624861	0.458052	0	1	0.0118162	0	1	0.272136	0	1	0.328628	0	1
-0.490598	0.0276482	0	1	0	0	1	8.12408	9	0.426011	0.558251	0	1	0.0118162	0	1	0.272136	0	1	0.410785	0	1
-0.483032	0.0299522	0	1	0	0	1	10.7238	11	0.51462	0.629822	0	1	0.0236324	0	1	0.272136	0	1	0.451863	0	1
-0.475465	0.0357123	0	1	0	0	1	14.4609	16	0.371521	0.815906	0	1	0.059081	0	1	0.317492	0	1	0.547713	0	1
-0.467898	0.0437764	0	1	0	0	1	21.2851	21	0.563482	1.17376	0	1	0.224508	0	1	0.362849	0	1	0.670949	0	1
-0.460331	0.0576005	0	1	0	0	1	32.0089	28	0.806698	1.53161	0	1	0.354486	0	1	0.453561	0	1	0.862648	0	1
-0.452764	0.0748806	0	1	0.21008	1	0.199047	45.4949	41	0.788991	2.10418	1	0.879895	0.638074	0	1	0.521595	0	1	1.17758	1	0.694474
-0.445197	0.0967688	0	1	0.420161	1	0.358474	71.8169	67	0.73273	3.17774	1	0.959267	1.20525	0	1	0.680341	0	1	1.69791	1	0.81907
-0.437631	0.112897	0	1	0.630241	1	0.486168	102.688	107	0.320992	4.32287	2	0.930774	1.79606	0	1	0.952477	0	1	2.1087	2	0.624573
-0.430064	0.155521	0	1	0.630241	1	0.486168	148.996	159	0.185237	5.8688	3	0.933264	2.57593	0	1	1.47407	0	1	2.87549	3	0.549754
-0.422497	0.220034	0	1	1.0504	1	0.670365	208.464	210	0.453726	8.33083	6	0.839158	3.84026	2	0.897381	1.8596	0	1	4.09416	5	0.389676
-0.414930	0.308738	0	1	1.78568	1	0.848415	291.33	286	0.633522	11.7948	10	0.741078	5.48271	6	0.468609	2.5853	0	1	5.99746	5	0.71645
-0.407363	0.440068	0	1	2.626	1	0.937615	424.077	401	0.889622	17.3201	16	0.658451	7.92867	11	0.175892	3.51509	0	1	8.83188	7	0.779354
-0.399796	0.616325	1	0.460272	3.67641	1	0.979436	607.681	577	0.913088	24.9066	26	0.439596	11.4972	16	0.12021	5.0572	5	0.571594	12.7206	11	0.725277
-0.392230	0.857095	1	0.575824	4.93689	1	0.994571	857.74	809	0.96551	35.2128	35	0.537336	16.33	20	0.21033	6.80341	6	0.67628	17.5953	15	0.766003
-0.384663	1.19809	2	0.336725	6.93265	3	0.974758	1197.81	1127	0.987319	49.4267	54	0.274627	23.1479	27	0.236226	9.20728	14	0.0823771	24.4143	19	0.889543
-0.377096	1.69806	3	0.242216	10.9242	5	0.987817	1658.45	1527	0.99979	69.4808	74	0.292497	32.5536	38	0.189516	12.541	17	0.130743	34.5333	29	0.850161
-0.369529	2.39618	3	0.429358	14.8107	7	0.993739	2311.14	2132	0.999977	96.5775	95	0.564225	44.8306	46	0.450351	17.8476	22	0.188153	47.6511	39	0.912493
-0.361962	3.30281	5	0.237838	22.6887	17	0.919979	3186.26	3045	0.996879	133.036	133	0.50124	61.7278	64	0.385542	24.3335	24	0.555243	65.7941	63	0.635657
-0.354395	4.46864	7	0.16482	31.8272	24	0.945437	4359.54	4224	0.987566	181.575	169	0.826407	83.7177	76	0.801954	32.9285	28	0.83037	90.0441	85	0.703778
-0.346829	6.02962	7	0.398458	41.7009	31	0.97083	5919.86	5770	0.983355	245.23	224	0.913985	112.667	106	0.736302	45.1066	39	0.840332	121.264	109	0.868972
-0.339262	8.08826	11	0.19282	57.1418	54	0.669827	7978.98	7758	0.996573	330.127	308	0.890068	151.188	139	0.840707	60.1648	52	0.856563	162.726	162	0.522842
-0.331695	10.6849	13	0.277249	75.7339	68	0.826305	10672.1	10370	0.999305	440.203	407	0.944578	201.242	189	0.807393	78.7608	64	0.953803	216.867	208	0.727892
-0.324128	14.2815	15	0.459395	101.889	106	0.333353	14248.3	13928	0.998325	584.89	537	0.976994	265.652	257	0.703392	104.342	84	0.978054	289.987	267	0.913037
-0.316561	18.8538	20	0.426058	136.552	139	0.412338	18834.1	18471	0.998087	769.786	723	0.955371	349.972	355	0.393385	138.109	118	0.95834	381.208	343	0.975662
-0.308994	24.7325	27	0.350166	181.194	187	0.324118	24716.1	24191	0.99987	1010.42	958	0.951757	458.61	463	0.418259	180.88	161	0.932698	502.678	466	0.95035
-0.301428	32.2528	39	0.136303	241.592	246	0.382082	32358.2	31728	0.999936	1323.06	1281	0.878106	600.924	603	0.46603	234.264	227	0.684557	659.406	633	0.849964
-0.293861	42.0622	49	0.159757	309.658	322	0.228984	42122.7	41212	0.999999	1718.71	1633	0.981455	780.2	747	0.884347	302.888	293	0.717466	860.006	828	0.864361
-0.286294	54.9578	69	0.0288609	395.476	424	0.0644639	54602.3	53632	0.999997	2226.34	2113	0.9923	1010.89	955	0.961702	393.441	396	0.448015	1115.95	1063	0.945015
-0.278727	71.3716	82	0.103658	509.445	557	0.0128315	70433	69211	1	2869.64	2709	0.998761	1303.6	1230	0.980031	506.673	505	0.530012	1442.65	1355	0.99004
-0.271160	91.8347	103	0.121326	657.236	692	0.0753844	90272.8	88721	1	3670.57	3509	0.996455	1666.97	1584	0.979775	648.41	657	0.366166	1848.74	1773	0.962281
-0.263593	117.5	134	0.0633337	831.708	858	0.166869	115114	113438	1	4671.82	4379	0.999992	2122.65	1996	0.997229	827.068	816	0.651902	2355.35	2201	0.999341
-0.256027	149.411	156	0.294142	1065.21	1109	0.0772666	145947	143996	1	5928.96	5592	0.999995	2696.9	2516	0.999782	1052.4	1030	0.758358	2991.34	2852	0.994987
-0.248460	189.275	197	0.286237	1350.71	1416	0.0295738	184116	181873	1	7493.31	7075	0.999999	3403.8	3185	0.999925	1329.07	1299	0.799081	3785.29	3568	0.999824
-0.240893	237.885	244	0.344951	1708.69	1765	0.0736652	230934	228073	1	9392.84	8975	0.999994	4267.13	4081	0.998037	1666.81	1648	0.680446	4752.55	4502	0.999884
-0.233326	297.718	306	0.314282	2143.66	2192	0.132996	288088	284840	1	11705	11307	0.999906	5317.91	5109	0.998158	2071.75	2108	0.208488	5931.94	5668	0.999746
-0.225759	369.512	369	0.510719	2670.02	2712	0.192884	357283	353527	1	14506.8	14094	0.999754	6592.35	6323	0.999623	2563.3	2622	0.118232	7347.56	7103	0.998133
-0.218192	455.738	455	0.513958	3290.49	3320	0.291005	440294	436118	1	17881.7	17423	0.999763	8124.16	7810	0.999806	3151.36	3190	0.240621	9057.67	8852	0.986141
-0.210626	559.204	552	0.621348	4046.78	4063	0.392187	539525	535002	1	21914.3	21409	0.999757	9956.48	9601	0.999861	3854.09	3895	0.249475	11102.9	10919	0.962695
-0.203059	682.404	668	0.712629	4969.03	4954	0.590778	657652	652898	1	26700.4	26056	0.999974	12134.2	11750	0.999822	4689.5	4667	0.632369	13541.5	13308	0.980111
-0.195492	828.337	808	0.764752	6024.79	6039	0.421552	796998	791170	1	32374.5	31627	0.99999	14710.4	14240	0.999966	5681.69	5698	0.411543	16431.5	16165	0.98374
-0.187925	998.512	995	0.545383	7290.84	7283	0.539704	960270	953252	1	39005.1	38219	0.999981	17721.9	17155	0.999994	6833.07	6885	0.257276	19811.4	19589	0.948722
-0.180358	1196.78	1175	0.741836	8754.57	8742	0.558338	1.1504e+06	1141417	1	46726.2	45736	0.999999	21233.4	20504	1	8166.2	8246	0.178553	23744.2	23474	0.965708
-0.172791	1427.38	1416	0.622662	10423	10341	0.811482	1.3694e+06	1359422	1	55634	54573	0.999999	25287.5	24612	0.999995	9718.87	9839	0.10056	28289.8	27918	0.989548
-0.165225	1691.35	1669	0.714864	12345.6	12276	0.756076	1.62047e+06	1607927	1	65863.7	64560	1	29941.9	29129	1	11493.9	11625	0.0982502	33505.9	33035	0.996609
-0.157658	1992.04	1940	0.89016	14540.4	14458	0.777468	1.90561e+06	1891257	1	77487.4	76157	1	35229.9	34357	1	13500.9	13639	0.102791	39454.3	39087	0.97512
-0.150091	2332.43	2253	0.95972	17002.3	16813	0.949416	2.22686e+06	2209251	1	90576.2	88923	1	41181.5	40036	1	15765.2	16013	0.0169496	46149.8	45676	0.990915
-0.142524	2711.83	2614	0.978149	19718.8	19502	0.961024	2.58623e+06	2565692	1	105212	103564	1	47838.5	46620	1	18301.3	18661	0.00193839	53640	53166	0.986655
-0.134957	3133.24	3005	0.993598	22750.3	22438	0.9917	2.98484e+06	2961551	1	121444	119733	1	55218.3	53986	1	21108.9	21464	0.003614	61958.6	61465	0.985123
-0.127390	3598.44	3454	0.995995	26117.2	25615	0.999868	3.42326e+06	3397690	1	139324	137495	1	63335.9	62081	1	24186.2	24486	0.0158981	71131.1	70605	0.985828
-0.119824	4106.76	3941	0.998085	29721.3	29147	0.999965	3.90103e+06	3872285	1	158846	156726	1	72219.9	70786	1	27545.3	27872	0.0130159	81149.2	80594	0.986108
-0.112257	4657.08	4478	0.998578	33618.8	32945	0.999996	4.41763e+06	4385884	1	179948	177614	1	81803.6	80181	1	31186.4	31666	0.000896994	91985.7	91394	0.987498
-0.104690	5249.65	5083	0.996155	37826.2	37012	1	4.97091e+06	4934239	1	202600	200159	1	92095	90445	1	35099.3	35505	0.00559865	103634	103119	0.969501
-0.097123	5879.26	5685	0.998641	42244.1	41277	1	5.55843e+06	5518185	1	226654	224125	1	103028	101330	1	39252.3	39744	0.00150239	116011	115451	0.975516
-0.089556	6542.55	6338	0.998901	46908.4	45707	1	6.17634e+06	6133350	1	251990	249432	1	114547	112883	1	43649.3	44198	0.000658365	129044	128425	0.982638
-0.081989	7238.62	6970	0.999956	51779.3	50541	1	6.82132e+06	6775465	1	278496	275963	1	126604	124928	1	48250.2	48843	0.000356368	142693	142067	0.981521
-0.074423	7959.61	7651	0.999995	56769.1	55415	1	7.4875e+06	7439436	1	305913	303404	1	139056	137341	1	53040.7	53570	0.00152744	156833	156358	0.939944
-0.066856	8700.22	8411	0.999977	61876.6	60481	1	8.16911e+06	8117723	1	334033	331388	1	151842	150050	1	57965.8	58493	0.00181816	171318	170715	0.974099
-0.059289	9454.65	9138	0.999995	67080.1	65586	1	8.85935e+06	8804259	1	362587	359742	1	164823	162795	1	62964.2	63485	0.00221254	186032	185321	0.988636
-0.051722	10214.3	9884	0.999998	72289.6	70732	1	9.5524e+06	9494629	1	391296	388178	1	177859	175666	1	68017.3	68380	0.0241419	200836	200077	0.992369
-0.044155	10976.1	10611	1	77412.5	75858	1	1.02418e+07	10182492	1	419962	416594	1	190873	188539	1	73070.3	73487	0.0115294	215598	214639	0.998955
-0.036588	11730.9	11362	1	82416.8	80854	1	1.09212e+07	10859797	1	448253	444971	1	203709	201462	1	78090.5	78571	0.00416399	230175	229149	0.999554
-0.029022	12471.5	12041	1	87286.3	85727	1	1.15847e+07	11522276	1	475968	472410	1	216306	213924	1	83017.8	83462	0.00676372	244462	243289	0.999942
-0.021455	13190.6	12780	1	91982.8	90400	1	1.2227e+07	12164090	1	502830	499405	1	228512	226216	1	87820.9	88355	0.00125634	258306	257026	0.999991
-0.013888	13884.5	13443	1	96507.4	94979	1	1.28425e+07	12779440	1	528661	525296	1	240220	237969	1	92469.1	93069	0.000258372	271614	270278	0.999998
-0.006321	14549.4	14085	1	100805	99263	1	1.3428e+07	13364870	1	553289	550050	1	251380	249265	1	96922	97463	0.000642532	284301	283012	0.999998
0.001246	15181.5	14750	1	104844	103394	1	1.39816e+07	13919384	1	576588	573234	1	261933	259895	1	101167	101607	0.0033893	296311	294888	1
0.008813	15772.2	15370	1	108594	107281	1	1.4497e+07	14436675	1	598355	595053	1	271797	269969	1	105135	105519	0.00710963	307504	306056	1
0.016379	16326.1	15954	1	112067	110809	1	1.49764e+07	14918196	1	618679	615529	1	281008	279222	1	108868	109152	0.0292718	317960	316637	1
0.023946	16839.6	16491	1	115276	114189	1	1.5418e+07	15363557	1	637436	634646	1	289503	288032	1	112322	112604	0.0244015	327617	326315	1
0.031513	17312.5	16978	1	118243	117283	1	1.58212e+07	15770552	1	654608	651929	1	297295	295878	1	115491	115828	0.00662475	336453	335196	1
0.039080	17742.5	17428	1	120919	119995	1	1.6187e+07	16139764	1	670190	667426	1	304358	302984	1	118405	118656	0.0251902	344461	343092	1
0.046647	18131	17833	1	123298	122456	1	1.65154e+07	16471669	1	684235	681661	1	310729	309450	1	121029	121243	0.038677	351682	350401	1
0.054214	18480	18233	1	125413	124711	1	1.6809e+07	16768466	1	696791	694384	1	316419	315236	1	123379	123544	0.0728544	358134	356963	1
0.061780	18792	18588	1	127286	126609	1	1.70689e+07	17032401	1	707957	705720	1	321484	320438	1	125490	125642	0.0751096	363856	362755	1
0.069347	19067.9	18885	0.999999	128933	128301	1	1.7298e+07	17264014	1	717831	715800	1	325965	325078	1	127375	127491	0.119954	368919	367898	1
0.076914	19309	19150	0.999997	130353	129845	1	1.74975e+07	17466774	1	726431	724709	1	329869	329154	1	129015	129109	0.150326	373329	372458	1
0.084481	19519.2	19387	0.999978	131581	131178	1	1.76709e+07	17643740	1	733909	732389	1	333265	332659	0.999999	130442	130524	0.164231	377165	376377	1
0.092048	19702.2	19584	0.999965	132651	132345	0.999998	1.78201e+07	17796174	1	740368	739003	1	336194	335600	1	131694	131833	0.0360374	380483	379779	1
0.099615	19859.1	19756	0.999926	133552	133307	0.999972	1.79474e+07	17925771	1	745909	744661	1	338715	338098	1	132767	132898	0.0317464	383328	382718	1
0.107181	19992.6	19929	0.994859	134324	134136	0.999671	1.80557e+07	18036989	1	750615	749461	1	340856	340334	1	133678	133777	0.0625546	385743	385162	1
0.114748	20105.9	20044	0.997016	134977	134817	0.999315	1.81471e+07	18130262	1	754596	753622	1	342666	342241	0.999999	134458	134545	0.069184	387783	387260	1
0.122315	20201.3	20153	0.991008	135505	135360	0.999315	1.82237e+07	18208979	1	757929	757060	1	344186	343800	0.999999	135121	135174	0.161098	389492	389055	1
0.129882	20280.8	20238	0.989894	135949	135819	0.999268	1.82874e+07	18274887	1	760707	760019	1	345446	345155	0.99997	135677	135713	0.229097	390914	390575	0.999995
0.137449	20347.5	20321	0.945091	136316	136183	0.999851	1.83401e+07	18329240	1	763009	762454	1	346496	346251	0.999916	136135	136146	0.403787	392094	391863	0.999584
0.145016	20402.6	20379	0.943516	136635	136517	0.999854	1.83835e+07	18373966	1	764909	764485	1	347362	347178	0.999205	136519	136536	0.333065	393067	392898	0.996832
0.152582	20447.2	20436	0.798484	136876	136791	0.998234	1.84187e+07	18410660	1	766455	766030	1	348067	347878	0.99985	136830	136837	0.421496	393855	393680	0.999221
0.160149	20483.6	20479	0.648728	137074	137004	0.996582	1.84475e+07	18440651	1	767714	767379	0.999999	348641	348503	0.99846	137089	137094	0.442517	394497	394354	0.998085
0.167716	20513.1	20501	0.872152	137229	137175	0.990656	1.84707e+07	18464930	1	768734	768429	1	349103	348985	0.997853	137295	137300	0.425807	395018	394891	0.998089
0.175283	20536.9	20516	0.986376	137361	137326	0.958088	1.84894e+07	18484465	1	769553	769331	0.999978	349475	349383	0.994143	137459	137480	0.194631	395436	395353	0.983137
0.182850	20556.1	20536	0.99157	137465	137435	0.951236	1.85042e+07	18500076	1	770208	770098	0.988778	349772	349721	0.94219	137595	137627	0.072607	395770	395738	0.825129
0.190417	20571.2	20557	0.97153	137546	137518	0.961724	1.8516e+07	18512397	1	770723	770634	0.981827	350006	349954	0.966291	137702	137720	0.175899	396036	396027	0.613269
0.197983	20583.2	20575	0.904132	137609	137585	0.953961	1.85253e+07	18522175	1	771130	771035	0.994098	350190	350138	0.9792	137785	137790	0.379283	396245	396232	0.679753
0.205550	20592.9	20586	0.894738	137661	137652	0.769209	1.85326e+07	18530123	1	771447	771391	0.953717	350335	350296	0.959615	137851	137877	0.043334	396407	396394	0.712783
0.213117	20600.5	20593	0.934837	137703	137700	0.595156	1.85384e+07	18536321	1	771700	771644	0.971682	350451	350415	0.965384	137905	137927	0.0515483	396535	396516	0.821816
0.220684	20606.3	20604	0.739776	137734	137729	0.695264	1.85429e+07	18541300	1	771895	771844	0.975666	350539	350511	0.946942	137946	137969	0.028489	396635	396607	0.938483
0.228251	20610.9	20610	0.652395	137758	137753	0.723901	1.85464e+07	18545097	1	772049	772008	0.964164	350608	350593	0.842871	137978	137995	0.0504317	396715	396691	0.928646
0.235818	20614.5	20611	0.86962	137775	137769	0.806705	1.85491e+07	18547935	1	772167	772143	0.883083	350662	350653	0.744274	138004	138016	0.0912517	396774	396760	0.844726
0.243384	20617.3	20614	0.884683	137789	137781	0.915931	1.85512e+07	18550225	1	772259	772240	0.86479	350704	350698	0.687242	138023	138041	0.0144231	396822	396799	0.970055
0.250951	20619.5	20616	0.919788	137800	137793	0.921486	1.85528e+07	18551997	1	772329	772311	0.880159	350735	350729	0.732149	138039	138054	0.0176629	396858	396837	0.971491
0.258518	20621.1	20620	0.76433	137807	137804	0.781063	1.85541e+07	18553415	1	772383	772359	0.965695	350760	350749	0.881081	138051	138058	0.1427	396886	396863	0.991873
0.266085	20622.5	20621	0.830328	137813	137809	0.866726	1.8555e+07	18554534	1	772424	772401	0.975081	350778	350765	0.951253	138060	138070	0.034814	396907	396884	0.99743
0.273652	20623.5	20622	0.860046	137817	137816	0.646178	1.85558e+07	18555361	1	772455	772440	0.926117	350792	350777	0.983662	138067	138079	0.00439494	396924	396911	0.95922
0.281219	20624.3	20623	0.865207	137821	137822	0.410799	1.85563e+07	18556047	1	772480	772467	0.918853	350803	350789	0.989137	138072	138082	0.00671633	396937	396926	0.958814
0.288785	20624.9	20624	0.846285	137822	137823	0.510212	1.85568e+07	18556544	1	772499	772490	0.875812	350812	350804	0.935913	138076	138086	0.0030904	396947	396934	0.988994
0.296352	20625.4	20624	0.917267	137825	137827	0.295384	1.85571e+07	18556908	1	772513	772507	0.841984	350818	350812	0.922414	138080	138086	0.0284443	396954	396948	0.916946
0.303919	20625.7	20624	0.960207	137827	137830	0.107737	1.85574e+07	18557158	1	772524	772515	0.927648	350823	350816	0.956743	138081	138086	0.0817266	396959	396953	0.937745
0.311486	20626	20625	0.916398	137828	137832	0.0147403	1.85576e+07	18557398	1	772532	772527	0.827419	350827	350823	0.881207	138083	138087	0.111717	396964	396958	0.932277
0.319053	20626.2	20625	0.952918	137829	137832	0.035817	1.85577e+07	18557613	0.999998	772538	772536	0.729	350830	350829	0.714954	138085	138087	0.286803	396967	396963	0.885797
0.326620	20626.3	20625	0.971648	137829	137832	0.0558316	1.85578e+07	18557745	0.999989	772543	772541	0.756798	350833	350831	0.780317	138086	138087	0.464868	396969	396967	0.799738
0.334186	20626.5	20625	0.985594	137830	137832	0.151585	1.85579e+07	18557837	0.999999	772548	772546	0.722728	350835	350835	0.558265	138087	138088	0.474245	396971	396968	0.911994
0.341753	20626.6	20625	0.992014	137830	137832	0.169376	1.8558e+07	18557920	0.999997	772551	772549	0.758771	350836	350835	0.782142	138088	138089	0.458948	396973	396970	0.922284
0.349320	20626.7	20625	0.995506	137830	137832	0.189256	1.8558e+07	18557978	0.999999	772553	772551	0.799857	350837	350836	0.814143	138089	138090	0.345755	396974	396972	0.884881
0.356887	20626.7	20626	0.971771	137831	137832	0.236289	1.85581e+07	18558041	0.999975	772555	772554	0.713038	350838	350838	0.636287	138089	138090	0.504814	396975	396973	0.904695
0.364454	20626.8	20626	0.980549	137831	137832	0.29501	1.85581e+07	18558079	0.999932	772556	772555	0.755155	350838	350838	0.752038	138090	138090	0.604042	396976	396974	0.885938
0.372021	20626.8	20626	0.988848	137831	137832	0.411554	1.85581e+07	18558114	0.999797	772557	772555	0.891366	350839	350838	0.850114	138090	138090	0.719708	396976	396974	0.942536
0.379587	20626.9	20626	0.993426	137831	137832	0.513832	1.85582e+07	18558143	0.999675	772558	772557	0.834473	350839	350839	0.78829	138090	138090	0.795371	396977	396975	0.938313
0.387154	20626.9	20626	0.995554	137831	137832	0.513832	1.85582e+07	18558163	0.999452	772559	772559	0.623292	350840	350840	0.609527	138090	138090	0.852292	396977	396976	0.904336
0.394721	20626.9	20627	0.927814	137832	137832	0.641526	1.85582e+07	18558175	0.999952	772560	772560	0.545303	350840	350841	0.34308	138090	138091	0.550781	396978	396977	0.838626
0.402288	20626.9	20627	0.939653	137832	137832	0.800953	1.85582e+07	18558185	0.999994	772560	772560	0.691203	350840	350841	0.440355	138091	138091	0.617718	396978	396977	0.908035
0.409855	20627	20627	0.95494	137832	137832	0.89496	1.85582e+07	18558199	0.999996	772561	772560	0.826869	350840	350841	0.551933	138091	138091	0.725316	396978	396977	0.960233
0.417422	20627	20627	0.967125	137832	137832	1	1.85582e+07	18558207	0.999998	772561	772560	0.898379	350841	350841	0.621598	138091	138091	0.776988	396978	396977	0.978913
0.424988	20627	20627	0.97496	137832	137832	1	1.85582e+07	18558219	0.999986	772561	772560	0.938161	350841	350841	0.683608	138091	138091	0.813465	396978	396977	0.985899
0.432555	20627	20627	0.978337	137832	137832	1	1.85582e+07	18558233	0.999035	772561	772560	0.976347	350841	350841	0.760795	138091	138091	0.851655	396979	396977	0.99581
0.440122	20627	20627	0.981726	137832	137832	1	1.85582e+07	18558237	0.999439	772561	772560	0.982961	350841	350841	0.788415	138091	138091	0.871417	396979	396977	0.997161
0.447689	20627	20627	0.982858	137832	137832	1	1.85583e+07	18558247	0.967706	772562	772561	0.946926	350841	350841	0.836693	138091	138091	0.891637	396979	396978	0.980192
0.455256	20627	20627	0.983992	137832	137832	1	1.85583e+07	18558248	0.972617	772562	772561	0.95055	350841	350841	0.846698	138091	138091	0.891637	396979	396978	0.980192
0.462823	20627	20627	0.987401	137832	137832	1	1.85583e+07	18558252	0.920969	772562	772561	0.960842	350841	350841	0.867067	138091	138091	0.891637	396979	396978	0.984705
0.470389	20627	20627	0.98968	137832	137832	1	1.85583e+07	18558256	0.755346	772562	772561	0.975838	350841	350841	0.909289	138091	138091	0.912327	396979	396978	0.990501
0.477956	20627	20627	0.990821	137832	137832	1	1.85583e+07	18558258	0.761391	772562	772562	0.853343	350841	350841	0.953566	138091	138091	0.933497	396979	396979	0.883303
0.485523	20627	20627	0.993108	137832	137832	1	1.85583e+07	18558259	0.784786	772562	772562	0.878308	350841	350841	0.964969	138091	138091	0.955158	396979	396979	0.907999
0.493090	20627	20627	0.993108	137832	137832	1	1.85583e+07	18558260	0.705865	772562	772562	0.878308	350841	350841	0.964969	138091	138091	0.955158	396979	396979	0.907999
0.500657	20627	20627	0.993108	137832	137832	1	1.85583e+07	18558260	0.81865	772562	772562	0.891063	350841	350841	0.964969	138091	138091	0.955158	396979	396979	0.907999
0.508224	20627	20627	0.9954	137832	137832	1	1.85583e+07	18558261	0.740087	772562	772562	0.917131	350841	350841	0.988184	138091	138091	0.977322	396979	396979	0.933385
0.515790	20627	20627	0.996548	137832	137832	1	1.85583e+07	18558261	0.831451	772562	772562	0.943961	350841	350841	0.988184	138091	138091	0.977322	396979	396979	0.959481
0.523357	20627	20627	0.997697	137832	137832	1	1.85583e+07	18558262	0.681567	772562	772562	0.957669	350841	350841	0.988184	138091	138091	1	396979	396979	0.959481
0.530924	20627	20627	0.997697	137832	137832	1	1.85583e+07	18558262	0.681567	772562	772562	0.957669	350841	350841	0.988184	138091	138091	1	396979	396979	0.959481
0.538491	20627	20627	0.997697	137832	137832	1	1.85583e+07	18558262	0.811787	772562	772562	0.957669	350841	350841	0.988184	138091	138091	1	396979	396979	0.959481
0.546058	20627	20627	0.997697	137832	137832	1	1.85583e+07	18558262	0.929378	772562	772562	0.971577	350841	350841	0.988184	138091	138091	1	396979	396979	0.972802
0.553625	20627	20627	0.998848	137832	137832	1	1.85583e+07	18558262	0.9736	772562	772562	0.971577	350841	350841	0.988184	138091	138091	1	396979	396979	0.972802
0.561191	20627	20627	1	137832	137832	1	1.85583e+07	18558263	0.837518	772562	772562	0.985686	350841	350841	1	138091	138091	1	396979	396979	0.986307
0.568758	20627	20627	1	137832	137832	1	1.85583e+07	18558263	0.837518	772562	772562	0.985686	350841	350841	1	138091	138091	1	396979	396979	0.986307
0.576325	20627	20627	1	137832	137832	1	1.85583e+07	18558263	0.837518	772562	772562	0.985686	350841	350841	1	138091	138091	1	396979	396979	0.986307
Two-tailed thresholding
Correlation coefficient threshold	Expected overlap with HPRD	Observed overlap with HPRD	p-val (HPRD)	Expected overlap with KEGG	Observed overlap with KEGG	p-val (KEGG)	Expected overlap with SymAtlas	Observed overlap with SymAtlas	p-val (SymAtlas)	Expected overlap with GO	Observed overlap with GO	p-val (GO)	Expected overlap with GO mol.	Observed overlap with GO mol.	p-val (GO mol.)	Expected overlap with GO cell.	Observed overlap with GO cell.	p-val (GO cell.)	Expected overlap with GO bio.	Observed overlap with GO bio.	p-val (GO bio.)
0.004759	20599	20602	0.324197	137643	137638	0.638534	1.85329e+07	18532922	0.551196	771503	771522	0.282218	350363	350368	0.403708	137904	137900	0.618919	396429	396451	0.175977
0.009519	20514.9	20520	0.314154	137074	137069	0.576783	1.84572e+07	18457144	0.519016	768351	768382	0.317073	348939	348907	0.770101	137349	137345	0.555486	394799	394838	0.202423
0.014278	20375	20400	0.0563838	136164	136169	0.452142	1.83318e+07	18331582	0.699982	763123	763166	0.325484	346579	346515	0.838033	136423	136464	0.154711	392095	392152	0.203628
0.019037	20181.5	20200	0.18749	134894	134861	0.739802	1.81576e+07	18157047	0.810751	755855	755941	0.250062	343292	343253	0.675484	135135	135196	0.123939	388342	388407	0.237897
0.023796	19935	19972	0.0759897	133247	133164	0.905928	1.79359e+07	17935298	0.807231	746610	746901	0.0321629	339108	339097	0.542241	133497	133593	0.0735257	383560	383781	0.0253382
0.028556	19638.4	19664	0.202151	131285	131177	0.925376	1.7669e+07	17667029	0.990717	735490	735500	0.478897	334071	333832	0.971675	131528	131585	0.233456	377823	378029	0.0625336
0.033315	19293	19311	0.304613	128980	128844	0.94297	1.73585e+07	17355903	0.996169	722560	722687	0.277483	328220	327960	0.964099	129251	129303	0.280404	371151	371502	0.0115656
0.038074	18901.5	18958	0.0775499	126389	126246	0.929879	1.7007e+07	17003810	0.998154	707913	708200	0.117485	321587	321256	0.979031	126665	126802	0.0875897	363590	364052	0.00389958
0.042834	18468.6	18560	0.0187583	123496	123384	0.852838	1.66179e+07	16614251	0.998688	691716	691910	0.233284	314258	313829	0.991454	123801	123821	0.430523	355230	355778	0.00215569
0.047593	17999.2	18106	0.0128503	120364	120172	0.949584	1.61937e+07	16190649	0.988843	674068	674410	0.119663	306258	305802	0.990005	120703	120685	0.559531	346141	346873	0.000230999
0.052352	17493.9	17596	0.0237608	116984	116742	0.972684	1.5738e+07	15734245	0.996409	655102	655731	0.0224258	297677	297323	0.953001	117351	117364	0.46161	336360	337263	3.00513e-05
0.057112	16956.8	17090	0.00762799	113379	113123	0.971942	1.52539e+07	15249712	0.997122	634971	635590	0.031972	288559	288294	0.880459	113785	113887	0.232841	325972	326751	0.000582886
0.061871	16392.8	16510	0.0216504	109578	109317	0.967115	1.47458e+07	14741173	0.998088	613812	614458	0.033418	278978	278773	0.806229	110047	110140	0.265252	315061	315796	0.00184134
0.066630	15807.4	15929	0.0226345	105650	105302	0.990451	1.42168e+07	14211231	0.999551	591776	592611	0.0119239	268996	268739	0.848809	106168	106378	0.0871879	303693	304626	0.000219792
0.071389	15202.3	15331	0.020809	101594	101340	0.949783	1.36703e+07	13664603	0.999484	569049	570253	0.000869962	258682	258536	0.713848	102142	102489	0.0155984	291974	293106	2.0635e-05
0.076149	14582	14703	0.0320228	97389.1	97053	0.982217	1.31103e+07	13104797	0.998898	545766	546767	0.00586554	248116	247829	0.858295	98019.6	98274	0.0635249	279973	281102	3.81374e-05
0.080908	13952.4	14115	0.00773606	93158.3	92807	0.983708	1.25409e+07	12534822	0.999529	522089	522960	0.0164632	237401	236950	0.949209	93817.9	94169	0.0202858	267759	268772	0.000274969
0.085667	13315.9	13480	0.0084245	88888.1	88525	0.984633	1.19653e+07	11958339	0.999885	498167	498953	0.0299119	226552	226024	0.9696	89578.2	89952	0.0165265	255442	256428	0.000502004
0.090427	12675.2	12846	0.00724311	84598.7	84236	0.983041	1.13877e+07	11380022	0.999967	474120	474681	0.0935011	215633	214932	0.992813	85327.3	85672	0.0267287	243053	243982	0.00115554
0.095186	12036.1	12213	0.00620433	80278.5	79875	0.990088	1.08108e+07	10802586	0.999989	450155	450490	0.217901	204754	203864	0.998922	81079	81447	0.0209583	230716	231552	0.0033958
0.099945	11402.5	11547	0.021452	76001.7	75686	0.964641	1.02378e+07	10230707	0.999854	426341	426445	0.405081	193958	192934	0.999766	76862.3	77140	0.064029	218466	219206	0.00871126
0.104705	10775.5	10907	0.0333467	71787.7	71540	0.920981	9.67153e+06	9665052	0.9995	402813	403100	0.254931	183276	182341	0.999262	72692.6	73014	0.0398883	206368	207225	0.00306288
0.109464	10156.1	10300	0.0224852	67609.7	67348	0.93197	9.11408e+06	9108251	0.998458	379639	379828	0.332462	172770	171792	0.999555	68585.9	68943	0.0259526	194455	195120	0.0168156
0.114223	9552.5	9682	0.0351992	63554.2	63295	0.930649	8.56845e+06	8564050	0.987371	356965	357241	0.263134	162468	161448	0.999743	64564.6	64976	0.0124026	182816	183483	0.0162556
0.118982	8963.55	9049	0.114886	59612.2	59369	0.918875	8.03661e+06	8032685	0.977624	334859	335026	0.349447	152435	151357	0.99989	60644.8	60915	0.0691499	171457	172062	0.0254392
0.123742	8391.51	8437	0.259414	55785.4	55559	0.905409	7.5205e+06	7516906	0.96816	313406	313630	0.300532	142699	141675	0.9998	56829.9	57063	0.0985909	160443	161014	0.0315298
0.128501	7837.38	7872	0.309618	52062.4	51789	0.94583	7.02093e+06	7018188	0.924356	292663	293037	0.188579	133275	132297	0.99969	53143.5	53472	0.0330622	149793	150353	0.0325288
0.133260	7303.47	7337	0.312598	48477.5	48268	0.894201	6.54025e+06	6537265	0.943345	272662	273008	0.203448	124191	123248	0.999596	49582.2	49878	0.0466582	139534	140183	0.0148842
0.138020	6792.59	6833	0.274579	45044.1	44991	0.626287	6.07921e+06	6076144	0.95125	253516	253734	0.297618	115496	114333	0.999987	46149	46494	0.0232471	129726	130414	0.00950786
0.142779	6302.63	6327	0.356211	41748.7	41682	0.660374	5.63843e+06	5636065	0.90382	235188	235191	0.497472	107165	106014	0.999989	42879.7	43191	0.0335191	120317	120799	0.0467086
0.147538	5835.91	5852	0.401744	38607.7	38584	0.559765	5.21837e+06	5216823	0.808866	217713	217544	0.666601	99217.4	98023	0.999997	39733.1	40025	0.0396341	111370	111788	0.0685014
0.152297	5392.53	5402	0.440356	35646.6	35682	0.409062	4.82e+06	4818023	0.873321	201134	201054	0.582761	91683.6	90595	0.999987	36739.4	37026	0.0387239	102874	103299	0.0604724
0.157057	4972.09	5016	0.237253	32814.6	32876	0.340847	4.44282e+06	4441727	0.74213	185433	185537	0.390385	84540.2	83535	0.999967	33907.1	34195	0.0343103	94841.1	95345	0.0294707
0.161816	4576.67	4639	0.148008	30142.8	30242	0.24731	4.08691e+06	4087512	0.355792	170619	170651	0.465263	77803.8	76826	0.999968	31238.6	31449	0.0854948	87254	87710	0.0392289
0.166575	4204.78	4266	0.144885	27687.7	27734	0.371182	3.75268e+06	3752848	0.458084	156682	156698	0.481483	71447.5	70587	0.999858	28721.5	28857	0.181777	80130.8	80504	0.0686326
0.171335	3855.91	3924	0.111842	25342.1	25394	0.351402	3.4387e+06	3439907	0.215956	143588	143623	0.459048	65482	64695	0.999699	26354.8	26510	0.141208	73441.6	73756	0.0978352
0.176094	3529.39	3571	0.220739	23168.8	23228	0.326115	3.14572e+06	3146925	0.207646	131361	131373	0.485347	59910.8	59126	0.999801	24135	24239	0.228114	67191	67477	0.111416
0.180853	3224.6	3258	0.260834	21137.6	21230	0.232778	2.8722e+06	2873980	0.105634	119955	120020	0.418427	54718.8	53983	0.999714	22065	22136	0.298933	61363.8	61706	0.065155
0.185613	2942.01	2988	0.179769	19238.3	19387	0.110928	2.61777e+06	2619963	0.0546958	109354	109456	0.368463	49884.2	49227	0.999304	20140.3	20184	0.367958	55958.3	56264	0.0801602
0.190372	2678.52	2716	0.218637	17478.2	17598	0.152575	2.38166e+06	2384269	0.0241018	99500.9	99669	0.282595	45390.9	44775	0.999086	18342.5	18459	0.17508	50919.6	51198	0.0916599
0.195131	2436.35	2458	0.320128	15864.2	15991	0.128999	2.16375e+06	2166467	0.0157749	90422.4	90548	0.327205	41253.7	40692	0.998471	16693.5	16785	0.222547	46276.7	46500	0.133097
0.199890	2211.55	2218	0.442232	14362.3	14473	0.151228	1.96211e+06	1964522	0.0234462	82024.2	82073	0.428001	37428.5	36961	0.994943	15163.7	15176	0.457476	41977.8	42134	0.208501
0.204650	2003.83	2007	0.470281	12970.8	13112	0.0842334	1.77673e+06	1779112	0.0200821	74274.6	74226	0.574927	33894.3	33421	0.996746	13744.3	13729	0.555377	38010.4	38069	0.375218
0.209409	1813.4	1810	0.533308	11702.5	11844	0.0742084	1.60657e+06	1608837	0.0206074	67167.1	67140	0.543933	30650.6	30241	0.993117	12431.7	12473	0.34728	34368.3	34392	0.446511
0.214168	1639.3	1648	0.411391	10548.1	10709	0.0424499	1.45061e+06	1452513	0.0363328	60669.4	60704	0.441482	27691.2	27334	0.987774	11246.4	11344	0.165743	31047.3	31038	0.52218
0.218928	1480.04	1478	0.521915	9498.26	9636	0.0607747	1.30799e+06	1309700	0.0454468	54714.3	54707	0.513013	24979.5	24637	0.988156	10149.2	10216	0.243001	28005.3	27966	0.596989
0.223687	1334.31	1316	0.698004	8541.02	8700	0.0302293	1.17762e+06	1178832	0.103212	49273.8	49328	0.399758	22496.1	22254	0.953351	9145.12	9174	0.375954	25227.7	25210	0.546121
0.228446	1200.83	1174	0.787688	7675.49	7837	0.0224661	1.0588e+06	1059927	0.109805	44310.9	44290	0.541108	20234.5	19962	0.976451	8233.6	8280	0.296876	22694.9	22617	0.704156
0.233206	1079.79	1064	0.689335	6887.38	7025	0.0360549	950780	951936	0.0917417	39811.1	39746	0.632155	18179.3	17923	0.97521	7400.43	7431	0.355885	20401.4	20302	0.764136
0.237965	968.621	944	0.791264	6155.14	6289	0.0325046	852563	853496	0.129151	35709.3	35605	0.715473	16305.6	16082	0.964364	6643.53	6634	0.548239	18303.1	18218	0.741666
0.242724	868.269	867	0.517565	5504.52	5634	0.0298714	763417	764503	0.0826517	31992.4	31874	0.752085	14614	14376	0.978476	5948.81	5920	0.650347	16401.2	16327	0.724369
0.247483	777.748	786	0.381398	4908	5032	0.0283778	683161	684236	0.0737572	28636.5	28515	0.769467	13077	12831	0.9863	5329.02	5294	0.689665	14682.3	14645	0.623998
0.252243	695.19	702	0.39632	4365.99	4440	0.114462	610333	610752	0.275821	25580.6	25494	0.710448	11680.2	11489	0.964858	4764.84	4705	0.813902	13122.7	13136	0.452839
0.257002	620.983	629	0.371881	3884.7	3908	0.344263	544772	545144	0.288138	22835.3	22719	0.784333	10430.5	10223	0.980985	4254.49	4222	0.695602	11721.3	11740	0.430022
0.261761	553.921	585	0.0902206	3441.12	3466	0.32487	485701	486224	0.202973	20356.3	20237	0.803275	9298.45	9118	0.971798	3790.97	3790	0.506467	10450.3	10440	0.540839
0.266521	493.528	527	0.0635119	3059.82	3077	0.369938	432633	432882	0.337856	18126.5	18081	0.634732	8283.69	8178	0.881447	3373.88	3378	0.471037	9306.33	9291	0.564328
0.271280	439.547	475	0.0436025	2729.99	2778	0.1633	384755	384658	0.568782	16126.5	16128	0.495183	7371.6	7256	0.914488	3004.09	3014	0.426653	8288.42	8336	0.297432
0.276039	391.135	422	0.0574473	2419.49	2479	0.098501	341884	341902	0.486391	14332.3	14292	0.633789	6552.82	6460	0.877877	2669.61	2660	0.575359	7369	7398	0.365674
0.280798	347.526	377	0.0553018	2148.6	2204	0.101434	303633	303408	0.673817	12735.5	12650	0.779319	5825.88	5735	0.886441	2374.1	2351	0.685677	6550.31	6521	0.643443
0.285558	308.514	342	0.0273037	1899.34	1932	0.2125	269401	269359	0.535369	11298.9	11168	0.894305	5168.98	5070	0.918532	2108.88	2073	0.787081	5810.84	5745	0.809521
0.290317	273.687	295	0.0972034	1687.36	1725	0.164916	238795	238725	0.562889	10021.4	9854	0.95498	4583.25	4501	0.890702	1873.21	1821	0.890367	5155.09	5054	0.923211
0.295076	242.706	260	0.131937	1501.86	1513	0.380025	211548	211377	0.658277	8878.69	8719	0.956998	4062.44	3972	0.924468	1663.14	1598	0.947972	4569.67	4511	0.810286
0.299836	215.162	228	0.189341	1329.7	1324	0.565972	187256	187290	0.46513	7863.92	7714	0.956506	3601.17	3530	0.88479	1474.55	1412	0.951192	4049.26	3977	0.874775
0.304595	190.762	185	0.662536	1178.03	1180	0.475648	165645	165805	0.333505	6951.56	6830	0.929918	3187.13	3126	0.863095	1303.35	1249	0.937006	3580.44	3518	0.854411
0.309354	168.894	160	0.754137	1035.8	1034	0.523672	146433	146547	0.372062	6140.87	6056	0.863278	2817.42	2799	0.637003	1153.18	1093	0.964076	3164.45	3105	0.857348
0.314114	149.421	139	0.804041	911.959	910	0.527419	129409	129596	0.283972	5425.8	5308	0.94701	2490.66	2452	0.782932	1021.28	956	0.980962	2795.23	2718	0.93003
0.318873	131.972	127	0.668014	799.776	791	0.628911	114265	114289	0.469032	4789.51	4637	0.987012	2198.45	2132	0.923663	900.159	833	0.988447	2467.9	2387	0.950002
0.323632	116.461	112	0.660858	706.185	702	0.566273	100813	100842	0.46017	4226.49	4064	0.994206	1940.68	1866	0.956372	790.828	704	0.999132	2180.69	2123	0.89388
0.328391	102.709	100	0.605682	626.564	611	0.744981	88824	88838	0.479466	3727.22	3575	0.994088	1712.65	1644	0.952821	697.531	617	0.999006	1923.25	1871	0.88545
0.333151	90.5445	90	0.522878	549.675	538	0.701056	78230.5	78362	0.303356	3284.02	3143	0.993503	1511.18	1450	0.943713	612.511	550	0.994776	1696.6	1639	0.92088
0.337910	79.8262	82	0.403647	480.874	469	0.716801	68887.2	68990	0.333995	2892.77	2761	0.993289	1332.75	1267	0.965251	537.605	494	0.971679	1495.72	1448	0.893405
0.342669	70.3636	74	0.331962	420.056	402	0.824499	60650.3	60654	0.493487	2545.86	2433	0.987983	1175.01	1130	0.907121	472.701	427	0.98341	1317.57	1269	0.911403
0.347429	61.9562	64	0.397357	373.103	355	0.839402	53461	53453	0.515105	2242.38	2154	0.970125	1035.38	1000	0.866023	416.709	381	0.961814	1163.01	1125	0.869504
0.352188	54.5534	56	0.422216	328.776	315	0.789314	47079.2	47013	0.63076	1972	1927	0.846614	911.277	898	0.671118	365.139	346	0.844824	1023.46	1006	0.708895
0.356947	48.0111	49	0.462355	288.86	274	0.822572	41366.5	41303	0.633691	1734.74	1707	0.749115	803.726	798	0.580588	320.917	309	0.749741	901.755	889	0.665741
0.361707	42.4239	40	0.666069	251.256	231	0.911819	36409.4	36184	0.901798	1525.97	1498	0.764847	708.617	714	0.419323	281.979	276	0.640768	793.376	772	0.777844
0.366466	37.2779	37	0.540097	219.429	200	0.917361	32050.1	31877	0.854916	1341.78	1308	0.823719	624.155	627	0.454357	248.642	249	0.490829	697.978	676	0.799097
0.371225	32.8288	29	0.771665	192.329	172	0.939495	28170.3	27956	0.91863	1179.84	1134	0.910737	549.618	552	0.45927	218.526	222	0.405964	613.603	585	0.877705
0.375984	28.9154	27	0.664499	167.014	153	0.874298	24775	24554	0.937668	1037.45	1010	0.804787	485.575	490	0.419894	192.332	196	0.394467	540.319	522	0.786428
0.380744	25.3845	25	0.557047	146.426	135	0.841018	21781.8	21678	0.77904	909.749	893	0.712144	425.678	444	0.185699	169.586	171	0.456254	474.457	457	0.790296
0.385503	22.3179	22	0.555203	128.044	116	0.869835	19172.3	19095	0.729294	801.663	794	0.60748	375.223	391	0.206176	149.267	160	0.186968	417.029	400	0.799571
0.390262	19.5323	17	0.747584	112.708	98	0.928547	16836.3	16760	0.739959	703.669	687	0.736701	330.511	341	0.280727	131.578	138	0.285495	366.42	351	0.791464
0.395022	17.2375	14	0.814594	98.8428	78	0.986683	14801.4	14763	0.63505	619.974	603	0.753931	291.588	293	0.466844	116.021	112	0.647193	322.713	317	0.625642
0.399781	15.1455	14	0.650743	87.0783	71	0.965764	12982.6	12979	0.513799	543.508	551	0.373041	256.754	263	0.347431	102.255	103	0.470296	283.154	294	0.258092
0.404540	13.2884	11	0.772497	76.1541	60	0.974843	11373.6	11416	0.331757	477.047	477	0.50087	225.843	221	0.627138	89.873	86	0.660339	247.758	250	0.442963
0.409299	11.7528	11	0.626497	66.2803	53	0.957711	9969.71	9991	0.407859	418.918	419	0.498381	198.228	199	0.478012	78.7381	72	0.778856	217.538	216	0.541823
0.414059	10.3473	8	0.809677	57.0368	45	0.954014	8744.27	8726	0.584563	368.145	372	0.419801	173.816	179	0.346188	69.236	66	0.653022	191.316	190	0.538177
0.418818	9.10433	8	0.688371	48.5285	39	0.939662	7659.38	7693	0.337314	323.414	325	0.464593	152.795	157	0.366074	60.6864	56	0.728623	168.614	169	0.488044
0.423577	8.02605	7	0.689986	43.3816	36	0.89969	6728.69	6725	0.519599	285.424	287	0.462561	134.941	138	0.395519	53.5882	51	0.639718	148.704	149	0.490253
0.428337	7.07103	6	0.708465	37.9195	33	0.823268	5928.63	5894	0.68847	252.458	264	0.232156	119.261	124	0.331192	48.0321	47	0.579817	131.643	139	0.259216
0.433096	6.25656	5	0.74802	33.1927	30	0.746782	5200.39	5195	0.532531	223.358	233	0.257868	105.495	106	0.480272	42.3172	44	0.417693	116.499	122	0.303871
0.437855	5.49278	5	0.641521	29.5163	29	0.568618	4562.16	4546	0.603126	197.349	205	0.291627	93.3243	89	0.673773	37.2373	41	0.287905	103.011	109	0.276181
0.442615	4.87876	4	0.717733	26.3651	26	0.56023	4003.87	3988	0.608004	174.904	182	0.294439	82.9969	78	0.709468	33.3594	37	0.284512	91.564	99	0.21694
0.447374	4.34884	4	0.631724	23.3189	23	0.560019	3507.33	3505	0.517134	154.407	165	0.195234	73.0241	68	0.722905	29.6175	36	0.137965	81.486	89	0.200949
0.452133	3.84541	4	0.535875	19.8526	22	0.338292	3078.21	3067	0.587408	135.569	150	0.105929	63.8429	64	0.492109	26.2158	32	0.148493	71.6272	80	0.159566
0.456892	3.46409	3	0.672642	17.6467	20	0.311326	2726.12	2692	0.762402	121.04	131	0.180913	56.8713	55	0.598569	23.0636	28	0.17361	63.7127	70	0.213834
0.461652	3.09199	3	0.597256	15.2308	18	0.262121	2402.62	2377	0.716026	107.499	120	0.112279	50.337	52	0.406789	20.5463	24	0.248422	56.4419	65	0.125669
0.466411	2.74178	2	0.75902	13.8653	16	0.31094	2125.58	2129	0.467739	95.9047	107	0.126886	44.6179	49	0.273986	18.1197	20	0.358821	50.2801	59	0.107797
0.471170	2.45724	2	0.704009	12.7099	13	0.509098	1888.2	1879	0.591472	85.9421	98	0.0950709	39.9387	46	0.18634	16.3962	19	0.289689	44.8714	53	0.127024
0.475930	2.21647	1	0.891159	10.6091	12	0.3714	1677.95	1673	0.552503	76.781	90	0.0643086	35.5904	42	0.159184	14.582	15	0.491705	40.3939	52	0.0433815
0.480689	2.01486	1	0.866829	9.55865	11	0.358672	1496.78	1490	0.575941	68.4216	82	0.0491152	31.6438	38	0.147788	12.9265	13	0.529971	36.3271	49	0.0249517
0.485448	1.81557	1	0.837438	8.82337	10	0.387869	1342.91	1312	0.821664	61.7512	72	0.0944722	28.5479	32	0.281977	11.7926	12	0.515548	32.6848	42	0.0645033
0.490208	1.63585	1	0.80541	8.08809	10	0.287705	1200.25	1173	0.804983	55.5818	66	0.0796278	25.5939	30	0.214747	10.7267	11	0.508133	29.6724	39	0.0559972
0.494967	1.46766	1	0.769743	7.14273	9	0.283056	1074.49	1040	0.874885	50.3571	59	0.10995	23.3606	28	0.191828	9.7062	10	0.50586	26.8106	35	0.07181
0.499726	1.33748	1	0.737708	6.19737	8	0.276963	962.216	914	0.955295	45.5046	53	0.148391	21.0092	25	0.217267	8.68569	9	0.503344	24.2774	33	0.0515907
0.504485	1.23495	1	0.70937	5.98729	8	0.246191	867.814	829	0.925033	41.1245	49	0.124778	18.9886	25	0.104924	8.02802	9	0.411403	22.1961	29	0.0927188
0.509245	1.11054	1	0.670839	5.77721	8	0.216631	781.862	755	0.853079	37.0593	41	0.278471	17.0271	20	0.264925	7.25697	9	0.303812	20.1148	25	0.161707
0.514004	1.02298	1	0.640701	5.14697	7	0.252131	700.621	677	0.835252	33.5523	35	0.423814	15.6092	18	0.30391	6.44056	7	0.464894	18.1293	21	0.27862
0.518763	0.93428	1	0.607351	4.93689	7	0.21975	633.353	622	0.688979	30.5464	32	0.419812	14.1912	17	0.259894	5.69219	6	0.505039	16.6231	19	0.310348
0.523523	0.839815	1	0.568426	4.93689	7	0.21975	574.048	568	0.608654	27.6549	30	0.351818	12.8206	16	0.219622	5.0572	5	0.571594	15.0347	18	0.25293
0.528282	0.798342	1	0.55014	4.72681	6	0.33332	518.804	508	0.697877	25.6652	27	0.421818	11.9344	13	0.416481	4.58096	5	0.484445	14.0899	17	0.250753
0.533041	0.729222	1	0.517925	4.62177	6	0.314075	471.197	463	0.660056	23.5324	25	0.407839	10.93	12	0.412323	4.05937	5	0.382885	12.9123	16	0.227427
0.537801	0.660101	0	1	4.41169	6	0.276195	428.302	419	0.688329	21.3138	23	0.385268	9.98468	10	0.540888	3.62849	3	0.705532	11.68	16	0.131833
0.542560	0.589829	0	1	4.30665	6	0.25767	392.881	378	0.79399	19.5961	21	0.404812	9.11028	10	0.427204	3.22028	2	0.834689	10.6667	15	0.121306
0.547319	0.554116	0	1	4.09657	6	0.221723	361.197	350	0.740134	18.3364	20	0.378726	8.614	10	0.361575	3.06153	2	0.813234	9.941	14	0.129757
0.552078	0.513796	0	1	3.99153	6	0.204413	335.2	317	0.861308	17.1197	20	0.272361	8.17681	10	0.304917	2.74404	2	0.762745	9.20158	14	0.0830231
0.556838	0.490756	0	1	3.99153	6	0.204413	308.39	286	0.91822	16.0748	19	0.262717	7.73961	10	0.250737	2.44923	2	0.705637	8.66756	13	0.0999039
0.561597	0.459652	0	1	3.78145	6	0.171384	287.43	263	0.942323	15.13	18	0.261086	7.30241	9	0.310536	2.29048	2	0.670376	8.18831	13	0.0719046
0.566356	0.434308	0	1	3.78145	6	0.171384	265.332	241	0.948691	14.3285	17	0.272052	6.85339	8	0.379321	2.08638	2	0.620098	7.75014	13	0.05128
0.571116	0.406659	0	1	3.67641	6	0.155766	246.485	221	0.961947	13.3694	17	0.190685	6.46346	8	0.321437	1.95031	2	0.583403	7.20243	13	0.0317315
0.575875	0.374403	0	1	3.67641	6	0.155766	225.2	200	0.96674	12.5392	14	0.376068	6.07352	5	0.726276	1.83692	2	0.550869	6.79164	12	0.0433364
0.580634	0.358275	0	1	3.57136	6	0.140808	209.114	185	0.965783	11.7662	13	0.397123	5.68359	5	0.671846	1.6555	2	0.495186	6.4904	11	0.0649627
0.585393	0.346755	0	1	3.25624	6	0.100294	199.365	176	0.964712	11.1937	12	0.444004	5.38818	4	0.786996	1.54211	2	0.458218	6.27132	10	0.102392
0.590153	0.329475	0	1	3.1512	6	0.0883528	189.454	169	0.947787	10.6497	11	0.498271	5.12823	3	0.887186	1.47407	2	0.435293	6.09331	10	0.0890512
0.594912	0.309891	0	1	3.1512	6	0.0883528	178.73	157	0.96214	10.0342	11	0.421269	4.78556	3	0.857666	1.31533	2	0.379869	5.79207	10	0.0689888
0.599671	0.302978	0	1	3.1512	6	0.0883528	168.493	148	0.95775	9.50459	11	0.354793	4.56105	3	0.834826	1.1339	2	0.313913	5.49083	10	0.0520576
0.604431	0.285698	0	1	3.1512	6	0.0883528	158.095	144	0.889693	8.91771	10	0.40167	4.33654	3	0.808892	1.04319	2	0.280292	5.17589	9	0.0787762
0.609190	0.27533	0	1	3.1512	6	0.0883528	151.758	140	0.85151	8.48828	10	0.345022	4.10022	3	0.777955	0.975155	2	0.25498	4.99788	9	0.0666062
0.613949	0.25229	0	1	3.1512	6	0.0883528	141.684	133	0.78733	7.87278	10	0.266724	3.80481	3	0.733609	0.816409	2	0.196334	4.71033	9	0.0495881
0.618709	0.243074	0	1	3.04616	5	0.18309	134.047	125	0.803414	7.50061	10	0.222418	3.58031	3	0.69543	0.771053	2	0.17988	4.50494	9	0.0393696
0.623468	0.225794	0	1	3.04616	5	0.18309	124.786	117	0.776852	6.94236	9	0.262433	3.34398	3	0.650908	0.634985	2	0.13211	4.27216	8	0.0676599
0.628227	0.207362	0	1	3.04616	5	0.18309	114.062	108	0.732448	6.31253	8	0.299334	3.07221	3	0.594186	0.589629	2	0.116926	3.88876	7	0.0979741
0.632986	0.195842	0	1	3.04616	5	0.18309	105.613	104	0.568089	5.94037	8	0.246804	2.83589	3	0.54023	0.544273	2	0.102229	3.66968	7	0.0777725
0.637746	0.180865	0	1	2.94112	5	0.164839	98.6263	101	0.39698	5.48231	7	0.310597	2.61138	3	0.485334	0.544273	2	0.102229	3.38213	6	0.125806
0.642505	0.155521	0	1	2.94112	5	0.164839	88.065	94	0.244762	4.92406	6	0.370618	2.36324	2	0.685271	0.521595	2	0.0950883	3.03981	6	0.0865828
0.647264	0.132481	0	1	2.94112	5	0.164839	78.8036	82	0.346992	4.3515	6	0.271143	2.10328	2	0.622912	0.498917	2	0.0880992	2.65641	6	0.052044
0.652024	0.125569	0	1	2.83608	5	0.147359	71.6544	74	0.381026	4.0509	6	0.221785	1.98512	2	0.591549	0.476239	2	0.0812729	2.43732	6	0.0368609
0.656783	0.112897	0	1	2.83608	5	0.147359	65.9675	69	0.341646	3.63579	6	0.159464	1.78425	2	0.533856	0.453561	2	0.0746209	2.16347	6	0.0223289
0.661542	0.103681	0	1	2.83608	5	0.147359	61.0931	67	0.204463	3.32088	6	0.118171	1.66608	2	0.497395	0.430883	2	0.0681548	1.99915	6	0.0157936
0.666302	0.101377	0	1	2.83608	5	0.147359	56.3811	64	0.133772	3.0346	6	0.0859818	1.52429	2	0.451305	0.362849	2	0.0499968	1.78007	6	0.00931776
0.671061	0.0944648	0	1	2.83608	5	0.147359	51.9941	59	0.144193	2.86283	6	0.0693137	1.47702	2	0.435411	0.362849	2	0.0499968	1.65683	6	0.0066545
0.675820	0.0817927	0	1	2.626	4	0.264748	47.1197	55	0.121197	2.60517	6	0.0481444	1.32341	2	0.382125	0.294814	2	0.033981	1.5336	6	0.00459153
0.680579	0.0783366	0	1	2.626	4	0.264748	44.8449	51	0.177274	2.44772	6	0.0374573	1.26433	2	0.361049	0.272136	2	0.0291858	1.45144	6	0.00350725
0.685339	0.0737286	0	1	2.52096	4	0.240787	42.2452	50	0.112809	2.34752	6	0.0315206	1.21707	2	0.343995	0.249458	2	0.0246882	1.42405	6	0.00319218
0.690098	0.0702726	0	1	2.52096	4	0.240787	39.808	47	0.124374	2.21869	6	0.0248383	1.15799	2	0.322477	0.249458	2	0.0246882	1.38298	6	0.00275966
0.694857	0.0668165	0	1	2.52096	4	0.240787	38.0207	44	0.165364	2.03261	6	0.0169658	1.11072	2	0.305132	0.249458	2	0.0246882	1.25974	6	0.00172227
0.699617	0.0645125	0	1	2.41592	3	0.440389	36.7208	43	0.148913	1.93241	6	0.0135343	1.05164	2	0.28334	0.249458	2	0.0246882	1.21866	6	0.00145298
0.704376	0.0622085	0	1	2.31088	3	0.411298	34.9335	38	0.311912	1.77495	6	0.0091698	0.968928	2	0.25274	0.204102	2	0.016652	1.1502	6	0.0010767
0.709135	0.0587525	0	1	2.31088	3	0.411298	32.3338	37	0.209398	1.63181	6	0.00617077	0.874398	2	0.217886	0.158746	2	0.0100109	1.09543	6	0.000833661
0.713894	0.0552964	0	1	2.1008	3	0.351874	30.709	34	0.285814	1.56024	6	0.00497413	0.850766	2	0.209232	0.158746	2	0.0100109	1.04066	6	0.000635314
0.718654	0.0552964	0	1	2.1008	3	0.351874	30.0591	32	0.379188	1.53161	6	0.00454693	0.850766	2	0.209232	0.158746	2	0.0100109	1.01327	6	0.000550911
0.723413	0.0541444	0	1	2.1008	3	0.351874	29.2467	31	0.391892	1.47436	6	0.00377414	0.83895	2	0.204918	0.158746	2	0.0100109	0.985884	6	0.000475426
0.728172	0.0518404	0	1	1.89072	3	0.291798	28.9217	31	0.366539	1.37416	5	0.0125525	0.803501	2	0.19204	0.158746	2	0.0100109	0.903727	5	0.00215174
0.732932	0.0506884	0	1	1.78568	3	0.261968	28.4343	30	0.40507	1.35984	5	0.0120376	0.791685	2	0.187771	0.158746	2	0.0100109	0.903727	5	0.00215174
0.737691	0.0460804	0	1	1.68064	2	0.512549	26.4845	30	0.256462	1.3169	5	0.0105784	0.779869	2	0.183516	0.136068	2	0.00725957	0.876341	5	0.00187736
0.742450	0.0426243	0	1	1.68064	2	0.512549	25.3471	28	0.313432	1.24533	5	0.00842344	0.732604	2	0.166647	0.136068	2	0.00725957	0.835263	5	0.00151514
0.747210	0.0391683	0	1	1.68064	2	0.512549	24.0473	27	0.286397	1.23102	5	0.00803217	0.720788	2	0.162473	0.136068	2	0.00725957	0.82157	5	0.00140673
0.751969	0.0368643	0	1	1.5756	2	0.47755	22.0975	26	0.211586	1.17376	5	0.0065932	0.673523	2	0.145981	0.136068	2	0.00725957	0.807877	5	0.00130404
0.756728	0.0322563	0	1	1.47056	2	0.44105	20.3102	23	0.291047	1.10219	5	0.0050608	0.638074	2	0.133857	0.136068	2	0.00725957	0.753106	5	0.000947877
0.761487	0.0264962	0	1	1.26048	2	0.36412	18.0355	21	0.257416	1.03062	4	0.0200028	0.602626	2	0.121979	0.136068	2	0.00725957	0.698334	4	0.00526487
0.766247	0.0184321	0	1	1.26048	2	0.36412	15.4358	17	0.372841	0.973361	4	0.0165546	0.59081	2	0.11808	0.136068	2	0.00725957	0.657256	4	0.00423402
0.771006	0.0149761	0	1	1.15544	2	0.324113	13.9734	15	0.426207	0.887477	4	0.0121245	0.531729	2	0.0990953	0.136068	2	0.00725957	0.588792	4	0.00283431
0.775765	0.0126721	0	1	1.0504	2	0.283473	12.836	13	0.527082	0.83022	4	0.00964319	0.531729	2	0.0990953	0.136068	2	0.00725957	0.53402	4	0.00197257
0.780525	0.0103681	0	1	1.0504	2	0.283473	11.6987	11	0.637234	0.758649	4	0.00703949	0.49628	2	0.0881638	0.136068	2	0.00725957	0.479249	4	0.00131129
0.785284	0.00921607	0	1	0.945361	2	0.242605	10.5613	9	0.749383	0.730021	4	0.00614403	0.49628	2	0.0881638	0.136068	2	0.00725957	0.451863	4	0.00104736
0.790043	0.00691206	0	1	0.840321	2	0.202015	10.0739	8	0.810122	0.715707	4	0.00572622	0.484464	2	0.0846055	0.136068	2	0.00725957	0.438171	4	0.000930404
0.794803	0.00691206	0	1	0.840321	2	0.202015	9.26145	7	0.839617	0.715707	4	0.00572622	0.484464	2	0.0846055	0.136068	2	0.00725957	0.438171	4	0.000930404
0.799562	0.00691206	0	1	0.840321	2	0.202015	8.93649	7	0.811306	0.701393	4	0.00532785	0.472648	2	0.0810925	0.136068	2	0.00725957	0.438171	4	0.000930404
0.804321	0.00576005	0	1	0.840321	2	0.202015	7.47415	6	0.779772	0.672764	4	0.00458716	0.460832	2	0.0776263	0.11339	2	0.00491358	0.410785	4	0.000724652
0.809080	0.00576005	0	1	0.840321	2	0.202015	7.47415	6	0.779772	0.644136	3	0.0266332	0.437199	1	0.355837	0.0680341	1	0.0665029	0.383399	3	0.00651163
0.813840	0.00576005	0	1	0.840321	2	0.202015	6.82423	5	0.83443	0.58688	3	0.0208634	0.389934	1	0.324469	0.0680341	1	0.0665029	0.383399	3	0.00651163
0.818599	0.00576005	0	1	0.840321	2	0.202015	6.49926	5	0.800714	0.572566	2	0.111945	0.378118	0	1	0.0453561	0	1	0.369706	2	0.052496
0.823358	0.00576005	0	1	0.840321	2	0.202015	5.84934	5	0.717366	0.558251	2	0.107324	0.378118	0	1	0.0453561	0	1	0.356014	2	0.0490425
0.828118	0.00576005	0	1	0.840321	2	0.202015	5.52438	4	0.825589	0.558251	2	0.107324	0.378118	0	1	0.0453561	0	1	0.356014	2	0.0490425
0.832877	0.00576005	0	1	0.840321	2	0.202015	4.54949	4	0.688843	0.529623	1	0.413423	0.366302	0	1	0.0453561	0	1	0.328628	1	0.281722
0.837636	0.00576005	0	1	0.840321	2	0.202015	4.06204	4	0.596808	0.515309	1	0.404904	0.354486	0	1	0.0453561	0	1	0.314935	1	0.27175
0.842395	0.00460804	0	1	0.630241	2	0.124321	3.24963	1	0.971167	0.472367	1	0.3786	0.330853	0	1	0.0453561	0	1	0.273857	1	0.240997
0.847155	0.00230402	0	1	0.630241	2	0.124321	2.59971	1	0.941398	0.41511	1	0.34171	0.307221	0	1	0.0453561	0	1	0.219085	1	0.197962
0.851914	0.00230402	0	1	0.525201	1	0.425861	2.27474	1	0.916455	0.386482	0	1	0.283589	0	1	0.0453561	0	1	0.1917	0	1
0.856673	0.00230402	0	1	0.525201	1	0.425861	1.7873	1	0.857788	0.300597	0	1	0.224508	0	1	0.0453561	0	1	0.150621	0	1
0.861433	0.00115201	0	1	0.525201	1	0.425861	1.13737	1	0.710959	0.271969	0	1	0.200875	0	1	0.0453561	0	1	0.150621	0	1
0.866192	0	0	1	0.525201	1	0.425861	0.812408	1	0.587929	0.24334	0	1	0.177243	0	1	0.022678	0	1	0.136928	0	1
0.870951	0	0	1	0.525201	1	0.425861	0.487445	0	1	0.229026	0	1	0.165427	0	1	0	0	1	0.123235	0	1
0.875711	0	0	1	0.420161	1	0.358474	0.162482	0	1	0.229026	0	1	0.165427	0	1	0	0	1	0.123235	0	1
0.880470	0	0	1	0.31512	1	0.283179	0	0	1	0.214712	0	1	0.153611	0	1	0	0	1	0.109543	0	1
0.885229	0	0	1	0.21008	1	0.199047	0	0	1	0.17177	0	1	0.129978	0	1	0	0	1	0.082157	0	1
0.889988	0	0	1	0.21008	1	0.199047	0	0	1	0.157456	0	1	0.118162	0	1	0	0	1	0.0684642	0	1
0.894748	0	0	1	0.21008	1	0.199047	0	0	1	0.114513	0	1	0.0827133	0	1	0	0	1	0.0547713	0	1
0.899507	0	0	1	0.21008	1	0.199047	0	0	1	0.114513	0	1	0.0827133	0	1	0	0	1	0.0547713	0	1
