# Supplementary material for: Directed Mammalian Gene Regulatory Networks Using Expression and Comparative Genomic Hybridization Microarray Data from Radiation Hybrids
Source: PubMed Central journal article supplement (PMC2690838; doi:10.1371/journal.pcbi.1000407), 2009-06-12
Supplement: pcbi.1000407.s002.pdf [file pcbi.1000407.s002.pdf]

**Table S1. Size of RH network constructed from right-tailed, left-tailed and both-tailed thresholding approaches.**

| Correlation coefficient threshold | Right-tailed thresholding        |                        | Left-tailed thresholding         |                        | Both-tailed thresholding         |                        |
|-----------------------------------|----------------------------------|------------------------|----------------------------------|------------------------|----------------------------------|------------------------|
|                                   | Num. of nodes with $\geq 1$ edge | Num. of directed edges | Num. of nodes with $\geq 1$ edge | Num. of directed edges | Num. of nodes with $\geq 1$ edge | Num. of directed edges |
| 0.9                               | 10                               | 9                      | 20,145                           | 401,775,989            | 10                               | 9                      |
| 0.8                               | 133                              | 132                    | 20,145                           | 401,775,866            | 133                              | 132                    |
| 0.7                               | 520                              | 508                    | 20,145                           | 401,775,490            | 520                              | 508                    |
| 0.6                               | 1,848                            | 1,992                  | 20,145                           | 401,774,006            | 1,848                            | 1,992                  |
| 0.5                               | 6,605                            | 10,199                 | 20,145                           | 401,765,799            | 6,616                            | 1,0263                 |
| 0.4                               | 18,463                           | 128,551                | 20,145                           | 401,647,447            | 18,733                           | 135,237                |
| 0.3                               | 20,145                           | 1,622,382              | 20,145                           | 400,153,616            | 20,145                           | 1,994,113              |
| 0.2                               | 20,145                           | 13,865,830             | 20,145                           | 387,910,168            | 20,145                           | 2,1761,977             |
| 0.1                               | 20,145                           | 69,376,471             | 20,145                           | 332,399,527            | 20,145                           | 132,863,571            |
| 0                                 | 20,145                           | 198,713,118            | 20,145                           | 202,526,457            | 20,145                           | 401,239,575            |
| -0.1                              | 20,145                           | 338,288,898            | 20,145                           | 63,487,100             | -                                | -                      |
| -0.2                              | 20,145                           | 393,879,851            | 20,145                           | 7,896,147              | -                                | -                      |
| -0.3                              | 20,145                           | 401,404,267            | 20,036                           | 371,731                | -                                | -                      |
| -0.4                              | 20,145                           | 401,769,312            | 4232                             | 6,686                  | -                                | -                      |
| -0.5                              | 20,145                           | 401,775,934            | 71                               | 64                     | -                                | -                      |
