# Supplementary material for: Directed Mammalian Gene Regulatory Networks Using Expression and Comparative Genomic Hybridization Microarray Data from Radiation Hybrids
Source: PLoS Comput Biol. 2009 Jun 12;5(6):e1000407. doi: 10.1371/journal.pcbi.1000407 (PMC2690838; doi:10.1371/journal.pcbi.1000407)
Supplement: Text S1 — Relationship between one-sided chi-square test and Bayesian log-likelihood score (LLS) method (0.08 MB PDF) [file pcbi.1000407.s001.pdf]

## Text S1. Relationship between one-sided chi-square test and Bayesian log-likelihood score (LLS) method

Here we show that the one-sided chi-square test used for evaluating the significance of the overlap between the RH network and other existing datasets and the Bayesian log-likelihood score (LLS) approach used for integrating diverse datasets [1,2] are closely related. The Fisher's exact test was used instead of the chi-square test when the expected value in a cell of the contingency table was  $\leq 50$  (see Methods). However, the chi-square test approximates the Fisher's exact test and useful insights into the overlap analysis are obtained through examining the chi-square test.

Suppose a reference and a test network, both of which are unweighted, and the following contingency table are given.

|                                       | Linked edges in test network | Non-linked edges in test network | Total   |
|---------------------------------------|------------------------------|----------------------------------|---------|
| Linked edges in reference network     | a                            | b                                | a+b     |
| Non-linked edges in reference network | c                            | d                                | c+d     |
| Total                                 | a+c                          | b+d                              | a+b+c+d |

A chi-square statistic without any correction is given by

$$\chi^2 = \frac{(ad - bc)^2 (a + b + c + d)}{(a + b)(c + d)(b + d)(a + c)}. \quad (1)$$

We used this statistic for evaluating the significance of the overlap between the RH and other existing networks. A log-likelihood score (LLS) is defined as

$$\begin{aligned}
LLS &= \log \frac{\frac{P(\text{linkage in reference network} \mid \text{linkage in test network})}{P(\text{no linkage in reference network} \mid \text{linkage in test network})}}{\frac{P(\text{linkage in reference network})}{P(\text{no linkage in reference network})}} \\
&= \log \frac{a(c+d)}{c(a+b)}
\end{aligned} \tag{2}$$

and was used for measuring the data quality of the test network compared to the gold standard reference network in a modified Bayesian framework [1,2]. We impose a constraint that  $LLS \geq 0$ . Indeed, only the datasets with  $LLS \geq \log 1.5$  were used in [1,2]. By combining (1) and (2), one can rewrite  $\chi^2$  using  $LLS$  :

$$\chi^2 = (a+b+c+d) \frac{(a+c)(c+d)}{(a+b)(b+d)} \left( 1 - \frac{a+b+c+d}{(a+b)\exp(LLS) + (c+d)} \right)^2.$$

The chi-square statistic  $\chi^2$  is a bijective function of  $LLS$  for  $LLS \geq 0$ . Therefore, the chi-square statistic has a monotonic relationship with the log-likelihood score (LLS).

[1] Lee I, Date SV, Adai AT, Marcotte EM (2004) A probabilistic functional network of yeast genes. *Science* 306: 1555-1558.

[2] Lee I, Lehner B, Crombie C, Wong W, Fraser AG, Marcotte EM (2008) A single gene network accurately predicts phenotypic effects of gene perturbation in *Caenorhabditis elegans*. *Nat Genet* 40: 181-188.
